## STAG2 cohesin is essential for heart morphogenesis

M. De Koninck<sup>1</sup>†, E. Lapi<sup>2,3</sup>†, C. Badia-Careaga<sup>4</sup>†, I. Cossio<sup>4</sup>, D. Giménez-Llorente<sup>1</sup>, M. Rodríguez-Corsino<sup>1</sup>, E. Andrada<sup>2</sup>, A. Hidalgo<sup>4,5</sup>, M. Manzanares<sup>4,6</sup>, F. X. Real<sup>2,3,7</sup> and A. Losada<sup>1\*</sup>

<sup>1</sup>Chromosome Dynamics Group, Molecular Oncology Programme, Spanish National Cancer Research Centre (CNIO), Melchor Fernández Almagro 3, 28029 Madrid, Spain

<sup>2</sup>Epithelial Carcinogenesis Group, Molecular Oncology Programme, Spanish National Cancer Research Centre (CNIO), Melchor Fernández Almagro 3, 28029 Madrid, Spain

<sup>3</sup>CIBERONC, Madrid, Spain

<sup>4</sup>Centro Nacional de Investigaciones Cardiovasculares (CNIC), Melchor Fernández Almagro 3, 28029 Madrid, Spain.

<sup>5</sup>Institute for Cardiovascular Prevention (IPEK), Ludwig-Maximilians-Universität Munich

<sup>6</sup>Centro de Biología Molecular ‘Severo Ochoa’ (CBMSO), CSIC-UAM, Madrid, Spain

<sup>7</sup>Departament de Ciències Experimentals i de la Salut, Universitat Pompeu Fabra, Barcelona, Spain

†equal contribution

\* Author for correspondence: [alosada@cnio.es](mailto:alosada@cnio.es)

Short title: *Stag2* ablation in embryos and adult mice

29 **Abstract**

30  
31 The distinct functions of cohesin complexes carrying STAG1 or STAG2 need to be unraveled.  
32 *STAG2* is commonly mutated in cancer and germline mutations have been identified in  
33 cohesinopathy patients. To better understand the underlying pathogenic mechanisms, we here  
34 report the consequence of *Stag2* ablation in mice. STAG2 is largely dispensable in adults and its  
35 tissue-wide inactivation does not lead to tumors but reduces fitness and affects both hematopoiesis  
36 and intestinal homeostasis. STAG2 is also dispensable for murine embryonic fibroblasts *in vitro*.  
37 In contrast, null embryos die by mid gestation showing global developmental delay and heart  
38 defects. Histopathological analysis and RNA-sequencing unveiled that STAG2 is required both for  
39 proliferation and regulation of cardiac transcriptional programs and in its absence, secondary heart  
40 field progenitors fail to enter the heart tube. These results provide compelling evidence on cell- and  
41 tissue-specific roles of the two cohesin complexes and how their dysfunction contributes to disease.

42

## 43 **Introduction**

44 Cohesin is a four-subunit complex that holds the sister chromatids together to ensure faithful DNA  
45 repair by homologous recombination and proper chromosome segregation during cell division (1).  
46 It is present in all cells and its cohesive function is essential for proliferation. In addition, cohesin  
47 contributes to the spatial organization of the genome and to the activation and repression of tissue-  
48 specific transcriptional programs together with architectural proteins such as CTCF and  
49 transcriptional regulators like Mediator (2–4). In the cohesin complexes present in vertebrate  
50 somatic cells, the Structural Maintenance of Chromosomes (SMC) heterodimer of SMC1A and  
51 SMC3 associates with the kleisin subunit RAD21 and with one of the two versions of the Stromal  
52 Antigen (SA/STAG) subunit, STAG1 or STAG2. The two variants are present in all tissues and  
53 cell types, but their functional specificity is not well established (5). We previously showed that  
54 genetic ablation of *Stag1* in mice is embryonic lethal, which indicates that the two complexes are  
55 not redundant, at least during embryonic development (6). Lethality starts after day 11.5 of  
56 gestation (E11.5) but a small fraction of embryos survive to E18.5 and present a severe  
57 developmental delay and general hypoplasia (7).

58 In *Stag1* null mouse embryonic fibroblasts (MEFs) telomere cohesion is impaired, preventing  
59 efficient replication of telomeres and causing chromosome segregation defects in mitosis (6).  
60 Centromere and arm cohesion are not clearly affected, which suggests that cohesin-STAG1 is  
61 specifically required for telomere cohesion whereas cohesin-STAG2 contributes to cohesion in  
62 other chromosomal regions. Results in human cells are in line with these findings, although the  
63 extent of cohesion defects reported in the absence of STAG2 is variable. In any case, a single  
64 variant is sufficient to maintain cell viability in culture (6, 8, 9).

65 Cohesin variants also contribute distinctly to genome organization and gene regulation. In *Stag1*  
66 null MEFs cohesin distribution is altered and so is their transcriptome (7). In the pancreas of  
67 heterozygous *Stag1* mice, the architecture of the *Reg* locus and the transcription of some of its

68 genes are also changed compared to pancreas from wild type littermates, suggesting that STAG2  
69 is not sufficient to compensate for the reduced levels of STAG1 (10). In human mammary  
70 epithelial cells, downregulation of STAG1 or STAG2 result in distinct changes in gene expression  
71 and chromatin contacts (5). Cohesin-STAG1 and cohesin-STAG2 colocalize with CTCF and play  
72 a major role in preservation of topologically associating domain (TAD) borders. By contrast,  
73 cohesin-STAG2 is also present at enhancers lacking CTCF that are bound by other transcriptional  
74 regulators (3, 5, 11). Importantly, cohesin-STAG1 cannot occupy these non-CTCF cohesin-sites  
75 even when STAG2 is absent (5). In mouse embryonic stem cells, cohesin-STAG2 promotes  
76 compaction of Polycomb domains and the establishment of long-range interaction networks  
77 between distant Polycomb-bound promoters that are important for gene repression (11).

78 Germline mutations in genes encoding cohesin and its regulatory factors are at the origin of a group  
79 of human syndromes collectively known as cohesinopathies. Cornelia de Lange syndrome (CdLS)  
80 is the most common of them and up to 60% of the patients carry heterozygous mutations in *NIPBL*,  
81 a protein involved in loading cohesin on chromatin (12). Clinical features often include growth  
82 retardation, intellectual disability, facial dysmorphism and congenital heart defects. Recently,  
83 germline mutations in *STAG1* and *STAG2* have been identified in patients with features partially  
84 overlapping those of CdLS and other cohesinopathies (13–17). Somatic mutations in cohesin  
85 genes, particularly in *STAG2*, have also been identified in several tumor types (18). *STAG2* has  
86 been recognized as one of the twelve genes significantly mutated in four or more cancer types (19).  
87 Among them, STAG2 loss is most frequent in urothelial bladder cancer (20). The evidence  
88 emerging from the study of diseases associated with both germline and somatic cohesin mutations  
89 strongly suggests that gene deregulation, rather than defects in chromosome segregation, underlies  
90 the pathogenic mechanism (12, 20, 21).

91 Given the growing importance of *STAG2* in human disease, we generated a *Stag2* conditional knock  
92 out (cKO) mouse strain to identify the consequences of eliminating cohesin-STAG2 in cells,  
93 embryos and adult tissues.

94

## 95 **Results**

### 96 *Mild cohesion defects in STAG2 deficient MEFs*

97 To generate a cKO allele of the X-linked *Stag2* gene, we used a targeting construct that carries loxP  
98 sites flanking exon 7 along with an FRT-flanked cassette encompassing a neomycin resistance  
99 selection gene, a splicing acceptor site and a polyadenylation sequence (Fig. S1A). Correctly  
00 targeted embryonic stem (ES) cells were screened by Southern blotting and were infected with  
01 adeno-FLP to eliminate this cassette before microinjection in C57BL/6J blastocysts (Fig. S1B).  
02 Germline transmission of the *Stag2*<sup>lox</sup> allele was assessed by PCR (Fig. S1C). Next, *Stag2*<sup>lox/lox</sup>  
03 females were crossed with males carrying *hUBC-CreERT2* for ubiquitous, tamoxifen-induced  
04 activation of the Cre recombinase. Embryos were extracted at embryonic stage E12.5 to generate  
05 cKO MEFs. Upon addition of 4-hydroxy-tamoxifen (4-OHT) to the culture medium for 4 days,  
06 STAG2 protein levels in treated MEFs (KO) dropped below 5% of the amount present in untreated  
07 MEFs (WT) and compensatory upregulation of STAG1 could be observed (Fig. 1A). The doubling  
08 time of STAG2 deficient cells was higher (Fig. 1B), but flow cytometry analysis did not reveal  
09 differences in the cell cycle profiles of WT and KO MEFs (Fig. 1C). We next examined cohesion  
10 and chromosome segregation. For these experiments, *Stag2* was deleted in serum-starved  
11 conditions and cells going through the first mitosis after release from the G0 arrest were collected.  
12 We detected very few cases of complete sister chromatid unpairing in metaphase spreads in WT or  
13 KO MEFs (1.3% and 3% of chromosomes examined, respectively; dark green square in Fig. 1D).  
14 However, we did observe a larger fraction of chromosomes per metaphase in which centromere  
15 cohesion was loosened, as evidenced by increased distance between sister centromeres (26% in KO  
16 vs 11% in WT MEFs; light green square in Fig. 1D). We also found a ca. 2-fold increase in the  
17 percentage of anaphase cells with lagging chromosomes and/or chromosome bridges among KO  
18 MEFs compared with WT MEFs (29% vs 17%), although the difference did not reach statistical  
19 significance (Fig. 1E). Finally, we observed that the proportion of metaphases with a normal

20 chromosome number (n=40) decreased more the longer MEFs were grown in the absence of  
21 STAG2 (Fig. 1F). Overall, these defects are milder than those identified in *Stag1* null MEFs (6) or  
22 in C2C12 myoblasts or HeLa cells after STAG2 downregulation by siRNA (6, 22). We conclude  
23 that primary cultured cells almost completely lacking cohesin-STAG2 can proliferate, although at  
24 slower rates, and maintain sufficient cohesion to divide successfully but lose chromosomes more  
25 frequently than wild type cells.

26

### 27 *STAG2 is required for hematopoietic maintenance in adult mice*

28 To determine whether STAG2 is essential in adulthood, 4-week old *Stag2* cKO mice carrying or  
29 not the *hUBC-CreERT2* transgene (KO and WT hereafter) were fed continuously with a tamoxifen-  
30 containing diet (TMX). We did not observe an acute loss of viability in the KO mice, but their  
31 survival was significantly shorter than that of WT mice (Fig. 2A). There were no preneoplastic or  
32 neoplastic lesions in the full necropsies of the mice analyzed (n=8). Likewise, a macroscopic  
33 assessment failed to reveal neoplasms in a large cohort of mice (n=63) of up to 70 weeks age,  
34 indicating that *Stag2* inactivation does not increase spontaneous tumor incidence in adult mice. At  
35 12 weeks, loss of STAG2 protein was confirmed by immunohistochemistry in a large fraction of  
36 cells (>80%) of all tissues analyzed (Fig. 2B, left panel; Fig. 2C). However, over time, the fraction  
37 of STAG2-negative cells dropped dramatically in the more proliferative tissues (e.g. intestine and  
38 spleen) and to a lesser extent in tissues with lower proliferation rates such as liver, pancreas or brain  
39 (Fig. 2B and 2C). In the peripheral blood of KO animals carrying a dual fluorescent Cre reporter  
40 (*Rosa26\_ACTB-tdTomato\_EGFP*), the population of recombined leukocytes (GFP+, STAG2-)  
41 decreased with time (Fig. 2D).

42 Upon treatment with TMX from weeks 4 to 12, KO mice displayed mild reductions in  
43 peripheral blood leukocyte, erythrocyte, and platelet counts pointing to anomalies in hematopoiesis  
44 (Fig. S2A,B). Analyses of leukocytes from peripheral blood and spleen of KO animals carrying the

45 fluorescent Cre reporter revealed an enrichment in myeloid cells (monocytes and neutrophils) and  
46 a significant reduction in T lymphocytes among STAG2 deficient cells compared with  
47 unrecombined cells (Fig. S2C). In bone marrow, a clear expansion of the LSK (Lin- Sca1+ c-Kit+)  
48 and myeloid progenitor (MP) compartment was associated with STAG2 loss (Fig. 2E, left). Further  
49 analysis of committed progenitors revealed increased frequency in CMPs (common myeloid  
50 progenitor) and GMPs (granulocyte-monocyte progenitor) and a decrease in MEPs  
51 (megakaryocyte-erythrocyte progenitor) among STAG2 deficient cells, in agreement with the  
52 findings in peripheral blood (Fig. 2E, right). Reductions in MEP paralleled a decrease in bone  
53 marrow Ter119+ cells in KO mice (Fig. S2D,E). Functional analyses revealed a higher colony  
54 forming capacity of STAG2 deficient hematopoietic cells (Fig. 2F), while the loss in lymphoid  
55 potential explained the reduced chimerism of mutant cells over time in peripheral blood (Fig. 2D).  
56 These results support the notion that STAG2 loss leads to increased self-renewal and impaired  
57 differentiation of hematopoietic stem cells (HSC), myeloid skewing and an overall competitive  
58 disadvantage when wild type HSC are present. These data are also consistent with previous reports  
59 on the contribution of cohesin to normal hematopoiesis and the occurrence of cohesin mutations in  
60 myeloid malignancies (21, 23, 24).

61  
62 *STAG2 is required for intestinal homeostasis*

63 Shortly after the initiation of TMX diet at 4 weeks, the survival curve of KO mice diverted from  
64 that of WT mice, the former showing reduced body weight (Fig. 2A and Fig. 3A). Histological  
65 analyses at 8 weeks failed to reveal major alterations in tissues of KO mice with the exception of  
66 the intestine where patches of epithelial erosion and necrosis were observed, with moderate/severe  
67 lesions present in 60% of mice. Wild type mice showed intestinal lesions although they were much  
68 milder (Fig. 3B). We analyzed proliferation and apoptosis in the small bowel: intestinal crypts from  
69 KO mice showed a significant reduction of BrdU+ cells (Fig. 3C) and a significant increase of



70 active caspase-3 labelling (Fig. 3D), suggesting reduced regeneration capacity. To acquire further  
71 insight into the requirement of STAG2 for intestinal cell renewal, we generated primary organoid  
72 cultures from the small intestine of TMX-treated KO mice carrying the fluorescent reporter (Figure  
73 3E, left). GFP<sup>+</sup> STAG2 null cells yielded fewer and smaller organoids than Tomato<sup>+</sup> STAG2  
74 proficient cells (Fig. 3E, right). These findings support the notion that STAG2 is required for  
75 intestinal homeostasis.

76  
77 *Stag2* null embryos display developmental delay by E9.5 and die soon afterwards

78 To determine whether STAG2 is essential for embryonic development, we crossed *Stag2*<sup>lox/lox</sup>  
79 females with males carrying the *CAG-Cre* transgene, coding for a Cre recombinase that is expressed  
80 ubiquitously from the zygote stage. Since *Stag2* is an X-linked gene, male embryos resulting from  
81 this cross would be either wild type (WT) or null (KO) for *Stag2* while females would be WT or  
82 heterozygous (see genotyping strategy in Fig. S1D). We thus focused our analyses on the male  
83 embryos. None of the KO male embryos extracted at E12.5 was alive, suggesting an earlier  
84 embryonic lethality (Fig. 4A). In litters extracted at earlier stages we found live KO embryos at (or  
85 close to) the expected Mendelian ratios at E8.5 and E9.5, but not later (Fig. 4A).  
86 Immunohistochemical analyses of embryo sections with STAG2-specific antibodies confirmed  
87 tissue-wide absence of the protein (a section from the E9.5 embryonic heart is shown as an example  
88 in Fig. 4B). Importantly, E9.5 KO embryos were visibly smaller than their wild type littermates  
89 with variable penetrance of the phenotype (mild and severe examples shown in Fig. 4C). Despite  
90 no overt gross morphological defects, at least in embryos displaying the more prevalent milder  
91 phenotype, a significantly reduced number of somites was observed in mutant embryos starting at  
92 E9.5, indicating a clear developmental delay. By 10.5 this difference was equivalent to a 1-day lag  
93 in somite counts.(Fig. 4D). Thus, loss of STAG2 causes a generalized developmental delay,  
94 noticeable by E9.5 with variable penetrance, and results in death by E10.5.

96 *Aberrant heart morphogenesis in Stag2 null embryos*

97 To identify developmental defects that could explain embryonic lethality, we analyzed the histology  
98 of E9.5 KO embryos with both severe and mild growth phenotypes and compared them with two  
99 different types of wild type controls: littermates (age-matched, WT1) and embryos from different  
00 litters but with the same number of somites (stage-matched, WT2). Mutants with a more severe  
01 phenotype showed aberrant morphology of several structures (neural tube, Fig. 4E; aorta, branchial  
02 arches, brain, otic and optic vesicles, Fig. S3). In contrast, most tissues and organs from KO  
03 embryos with a milder phenotype did not show obvious malformations but were clearly more  
04 similar to stage-matched than to age-matched controls (Fig. 4E; Fig. S3). A remarkable exception  
05 to this general trend was a selective defect in the developing heart: the prospective atria and right  
06 ventricle were reduced in size compared to both controls, while no clear differences were found in  
07 the left ventricle (compare images for WT1, KO mild and WT2 under HC, heart chambers, in Fig.  
08 4E). Morphological defects were also observed in the outflow tract (OFT), where KO embryos  
09 showed an aberrant rightwards turning at the junction with the ventricular myocardium when  
10 compared to stage-matched controls (white arrowhead in WT1 and KO mild under OFT in Fig. 4E).  
11 However, the inflow tract (IFT) appeared normal (Fig. 4E). The defects described above were  
12 exacerbated in mutants with a severe phenotype, which displayed distended atria and ventricles  
13 with no visible indication of a future septum between right and left chambers (black arrowheads in  
14 WT1 and KO severe, under HC, in Fig. 4E), and abnormal right ventricle development (asterisk in  
15 Fig. 4E). In this case, both the OFT and the IFT were distended. Despite the variable penetrance of  
16 the phenotype by E9.5, all mutants displayed severe cardiac anomalies by E10.5, resembling those  
17 identified in the severe KO phenotype by E9.5, as well as extensive necrosis and apoptosis (Fig.  
18 4F). Thus, defective heart function may account for the embryonic lethality of *Stag2* KO embryos.

19

20

21 *Decreased proliferation in Stag2 mutant embryos*

22 To shed light into the cellular mechanisms leading to the defects described above, we first  
23 confirmed that both STAG1 and STAG2 are expressed in the heart of E9.5 wild type embryos using  
24 immunofluorescence (Fig. S4). These findings are consistent with data from single cell RNA  
25 sequencing of E8.25 murine embryos, which shows similar patterns of expression for both genes  
26 (25). We next analyzed proliferation and apoptosis in E9.5 WT1, WT2, and KO embryos with  
27 milder phenotype to uncover primary defects. Heart sections, as well as sections containing the  
28 neural tube for comparison, were labeled with anti-phosphohistone H3 (H3P) to detect proliferating  
29 cells and with Terminal deoxynucleotidyl transferase dUTP nick end labeling (TUNEL) to mark  
30 apoptotic cells. To identify the different heart compartments, co-labeling with Islet 1 (ISL1) was  
31 used: ISL1 is a transcription factor expressed throughout the anterior and posterior secondary heart  
32 field progenitors (ASHF and PSHF, respectively) and is progressively turned off in their  
33 descendants as they migrate into, and populate, the heart tube through its anterior and posterior ends  
34 (OFT and IFT, respectively, see scheme in Fig. S5A)(26). The fraction of H3P-positive cells in the  
35 heart chambers (atria and ventricles) was significantly lower in the mutant as compared to their  
36 littermate age-matched WT1 controls, but similar to WT2 stage-matched controls (HC in Fig. 5A,  
37 5B, and Fig. S5B). These differences were reproduced in ASHF and OFT, as well as the neural  
38 tube, while they were less prominent in PSHF and IFT (Fig. 5A and 5B, Fig. S5B). There was also  
39 increased apoptosis in mutant neural tube and heart chambers as compared to both controls,  
40 although the number of TUNEL positive cells was very low in all cases and inter-individual  
41 variability high (Fig. S6). These results suggest that the global developmental delay observed in  
42 *Stag2* mutants at E9.5 is mainly due to a decrease in proliferative capacity of mutant cells.

43

44

45

46 *Impaired deployment of progenitors into the heart tube in Stag2 mutant embryos*

47 While decreased proliferation might account for the global growth delay observed in the heart (and  
48 other organs) in mutant embryos, it failed to explain why morphological defects were more evident  
49 in certain heart structures, i.e. the OFT and right ventricle (Fig. 4E). Interestingly, these structures  
50 derive from second heart field (SHF) progenitors, while the left ventricle derives from the first heart  
51 field (FHF) (27). More specifically, ISL1+ progenitors present in the ASHF migrate into the heart  
52 tube contributing to the OFT and right ventricle (Fig. S5A). In mutant embryos, the length of inner  
53 and outer curves of the OFT was reduced compared to controls, suggesting a problem in the  
54 migration of ASHF progenitors (ISL1+) into the OFT (Fig. S7). To test this possibility, we  
55 quantified total cell numbers in heart sections. In the neural tube, heart chambers and OFT,  
56 cellularity of KO embryos was lower than in WT1 and more similar to WT2 embryos, consistent  
57 with reduced size and proliferation rates. In contrast, cell numbers in the ASHF were similar in KO  
58 and WT1 littermates (Fig. 5C), despite mutants showing a much reduced proliferation rate (Fig.  
59 5B). Moreover, while the fraction of ISL1+ progenitors in ASHF was similar in all embryos, it  
60 decreased in the OFT of KO embryos compared to both controls (Fig. 5D). These findings strongly  
61 suggest that STAG2 loss results in accumulation of progenitors in the ASHF that fail to migrate  
62 into the heart tube, leading to morphological defects in ASHF derivatives such as the right ventricle  
63 and the OFT. Defects in migration of progenitors has been suggested as the cause of heart defects  
64 in murine embryos and zebrafish deficient for the cohesin loader NIPBL (28, 29).

65

66 *Altered transcription of cardiac development regulators in Stag2 mutant embryos*

67 To address if the role of cohesin in gene regulation could contribute to the phenotypes described  
68 above, we compared the heart transcriptomes of E9.5 *Stag2* KO and WT embryos by RNA-seq. To  
69 exclude variation related to developmental stage, we selected littermate embryos of both genotypes  
70 with similar number of somites. To identify tissue-specific changes, we extracted RNA from the

71 heart and from the neural tube lying adjacent to the heart. There were 1,881 differentially expressed  
72 genes (DEGs, FDR<0.05) between wild type samples of the two tissues, which defined a cardiac-  
73 enriched and a neural-enriched gene set (1,116 and 765 genes, respectively). Gene Ontology  
74 analysis confirmed the functional specificity of these gene sets (“cardiac” and “neural” genes, for  
75 simplicity; Fig. 6A and Table S1). STAG2 loss had a greater impact on the heart transcriptome, as  
76 shown in the heatmap of Fig. 6A. Accordingly, pairwise comparisons between WT and KO samples  
77 for each tissue identified 846 DEGs in heart but only 5 in neural tube (FDR<0.05; Fig. 6B and Table  
78 S2). Among the DEGs in heart, there were 222 and 112 genes from the cardiac and neural gene  
79 sets, respectively, indicating that tissue-specific genes were preferentially affected by STAG2 loss  
80 (Fig. 6C and Table S1). Moreover, most cardiac genes were downregulated in the heart of mutant  
81 embryos, whereas the neural genes were upregulated therein (Fig. 6D). These findings agree with  
82 the proposed role of cohesin-STAG2 in tissue-specific transcription, promoting activation of genes  
83 specifying a tissue (i.e., cardiac genes in heart) and repression of alternative gene programs (e.g.,  
84 neural genes in heart) (5). A closer look at the list of DEGs in heart revealed several cardiomyocyte  
85 markers and well-established regulators of SHF among the downregulated genes (Fig. 6B, right).  
86 For instance, *Fgf8* and *Hand2* contribute to the survival of ASHF progenitors while *Wnt5a* activity  
87 is critical for their deployment into the OFT (30–32), consistent with the defects described in the  
88 previous section. Taken together, our data suggest an important role of STAG2 in the control of the  
89 early cardiac transcriptional programs that is not assumed by STAG1 in the *Stag2* KO embryos and  
90 which, together with decreased proliferation, contributes to the observed defects in heart  
91 morphogenesis.

92

## 93 **Discussion**

94 A major challenge in cohesin biology is to understand the specific functions of STAG1 and STAG2  
95 (5, 11). To address this question, we previously characterized a *Stag1* KO mouse (6, 7) and we have  
96 now generated a *Stag2* KO mouse. While our manuscript was in revision, a study describing the  
97 consequences of *Stag2* ablation in the hematopoietic system was published, demonstrating a  
98 specific role for STAG2 in balancing self-renewal and differentiation in hematopoietic precursors  
99 (24). Here, we describe instead the consequences of ubiquitous STAG2 elimination in embryos and  
00 adult mice.

01 Whole body deletion of *Stag2* in young mice does not result in acute loss of viability, which  
02 suggests that STAG1 can largely compensate for the lack of STAG2 postnatally. Efficiency of Cre-  
03 mediated recombination of the *Stag2* cKO allele was high in adult tissues 8 weeks after Cre  
04 induction but the fraction of recombined cells decreased notably over the subsequent weeks in  
05 proliferative tissues despite continuous TMX administration. This observation indicates a clear  
06 proliferative disadvantage of STAG2 deficient cells and does not allow us to rule out that a more  
07 severe phenotype might be disclosed upon achieving a more complete or sustained depletion of  
08 STAG2. Consistent with results obtained upon *Stag2* deletion in HSC using *Mx1-Cre*, ubiquitous  
09 deletion also results in increased self-renewal and defective lineage commitment (24).  
10 Histopathological analyses also revealed defects in gastrointestinal tract homeostasis, most likely  
11 related to the toxicity of prolonged TMX administration from an early age (33) and the impaired  
12 regeneration capacity of *Stag2* KO crypt cells. Reduced proliferation was also found in *Stag2* null  
13 embryos, and probably contributes to their growth retardation. Our in vitro studies using *Stag2* null  
14 MEFs show loosened centromere cohesion that could lead to an increased rate of chromosome  
15 segregation defects and the generation of aneuploid, inviable cells thus contributing to reduced  
16 proliferation in vitro and in vivo.

17 In contrast to the redundancy and functional compensation of the STAG proteins in adult mice,  
18 embryos require both proteins to complete development. Constitutive inactivation of *Stag1* in the  
19 germline is embryonic lethal and causes severe development delay, with incomplete penetrance,  
20 but no obvious organ malformation (6, 7). In contrast, inactivation of *Stag2* in the germline leads  
21 to earlier lethality, starting at E9.5. This phenotype is associated with a broad, subtle, general tissue  
22 disorganization and a dramatic effect on heart development with no *Stag2* null embryos surviving  
23 beyond E10.5. It is unlikely that reduced proliferation alone accounts for these defects. Other mouse  
24 models partially deficient for genes important for cell proliferation, such as those carrying  
25 hypomorph alleles of the MCM replicative helicase, survive to later stages of embryo development  
26 and the associated lethality seemingly results from impaired expansion of hematopoietic precursors  
27 (34). Mutant mice in the centrosome component *Cep57* that display more severe chromosome  
28 segregation anomalies than those reported here also survive to birth (35).

29 Increasing evidence supports the notion that the presence of cohesin-STAG2 at enhancer elements  
30 independently of CTCF promotes cell type-specific transcription, a function that is not compensated  
31 by cohesin-STAG1 (5, 11, 24). Consistent with this idea, our transcriptome analyses uncovered  
32 altered tissue-specific transcription patterns in *Stag2* null embryonic hearts, with lower expression  
33 of cardiac genes and de-repression of genes from other lineages. Thus, we propose that defects in  
34 both proliferation and lineage specification contribute to the heart abnormalities observed in the  
35 STAG2 deficient embryos, as previously suggested in NIPBL deficient embryos or zebrafish with  
36 reduced cohesin levels (29, 36).

37 Our results support a causative contribution of cohesin-STAG2 function to the cardiac anomalies  
38 detected in CdLS patients, most of them carrying *NIPBL* mutations (37). Cohesinopathy cases with  
39 *STAG2* mutations have been reported recently. Among those, male patients carry missense variants  
40 and show milder phenotypes that do not include heart defects while ventricular septal defects and  
41 other heart anomalies have been described in female patients carrying loss of function or missense

42 variants (13–17). Since *STAG2* is an X-linked gene, the embryonic lethality of *Stag2* null murine  
43 embryos reported here explains why inactivating germline mutations will not be tolerated in males  
44 while heterozygous females may survive through the selection of cells in which the wild type allele  
45 is not silenced by the X inactivation process. The variable penetrance observed in *STAG2* deficient  
46 mice as well as the contribution of epistatic events thus likely accounts for phenotypic diversity in  
47 patients carrying *STAG2* mutations.

48 In summary, we here show that cells lacking cohesin-*STAG2* are viable both in vitro (tissue culture)  
49 and in vivo (in embryos and adult tissues), confirming that cohesin-*STAG1* is sufficient to fulfill  
50 essential cohesin functions (8, 9). However, their decreased proliferation and altered transcriptomes  
51 lead to embryonic lethality, a result that provides further compelling evidence for cell- and tissue-  
52 specific roles of the two cohesin complexes and how their dysfunction may contribute to disease.  
53 We speculate that genomic changes derived from decreased accuracy of chromosome segregation  
54 and/or DNA repair as well as transcriptional alterations affecting cell identity may underlie the  
55 behavior of *STAG2* mutant tumors. While inactivation of *Stag2* in adult mice did not increase tumor  
56 incidence in our study, similar to other major tumor suppressor genes such as *Cdkn2a* or *Rb* (38,  
57 39), these mice will be useful to model the cooperation of *STAG2* mutations with other genetic  
58 alterations in promoting tumorigenesis in a wide variety of cell types.

59  
60 **References**

- 61 1. K. Nasmyth, C. H. Haering, Cohesin: its roles and mechanisms. *Annu Rev Genet.* **43**, 525–  
62 558 (2009).
- 63 2. J. M. Downen, Z. P. Fan, D. Hnisz, G. Ren, B. J. Abraham, L. N. Zhang, A. S. Weintraub, J.  
64 Schuijers, T. I. Lee, K. Zhao, R. A. Young, Control of cell identity genes occurs in  
65 insulated neighborhoods in mammalian chromosomes. *Cell.* **159**, 374–387 (2014).
- 66 3. A. J. Faure, D. Schmidt, S. Watt, P. C. Schwalie, M. D. Wilson, H. Xu, R. G. Ramsay, D.  
67 T. Odom, P. Flicek, Cohesin regulates tissue-specific expression by stabilising highly  
68 occupied cis-regulatory modules. *Genome Res.* **22**, 2163–2175 (2012).
- 69 4. M. H. Kagey, J. J. Newman, S. Bilodeau, Y. Zhan, D. A. Orlando, N. L. van Berkum, C. C.  
70 Ebmeier, J. Goossens, P. B. Rahl, S. S. Levine, D. J. Taatjes, J. Dekker, R. A. Young,  
71 Mediator and cohesin connect gene expression and chromatin architecture. *Nature.* **467**,  
72 430–435 (2010).



- 73 5. A. Kojic, A. Cuadrado, M. De Koninck, D. Giménez-Llorente, M. Rodríguez-Corsino, G.  
74 Gómez-López, F. Le Dily, M. A. Marti-Renom, A. Losada, Distinct roles of cohesin-SA1  
75 and cohesin-SA2 in 3D chromosome organization. *Nat. Struct. Mol. Biol.* **25**, 496–504  
76 (2018).
- 77 6. S. Remeseiro, A. Cuadrado, M. Carretero, P. Martínez, W. C. Drosopoulos, M. Cañamero,  
78 C. L. Schildkraut, M. A. Blasco, A. Losada, Cohesin-SA1 deficiency drives aneuploidy  
79 and tumorigenesis in mice due to impaired replication of telomeres. *EMBO J.* **31**, 2076–  
80 2089 (2012).
- 81 7. S. Remeseiro, A. Cuadrado, G. Gómez-López, D. G. Pisano, A. Losada, A unique role of  
82 cohesin-SA1 in gene regulation and development. *EMBO J.* **31**, 2090–2102 (2012).
- 83 8. P. van der Lelij, S. Lieb, J. Jude, G. Wutz, C. P. Santos, K. Falkenberg, A. Schlattl, J. Ban,  
84 R. Schwentner, T. Hoffmann, H. Kovar, F. X. Real, T. Waldman, M. A. Pearson, N. Kraut,  
85 J. M. Peters, J. Zuber, M. Petronczki, Synthetic lethality between the cohesin subunits  
86 STAG1 and STAG2 in diverse cancer contexts. *Elife.* **6**, e26980 (2017).
- 87 9. Y. Liu, H. Xu, K. Van der Jeught, Y. Li, S. Liu, L. Zhang, Y. Fang, X. Zhang, M.  
88 Radovich, B. P. Schneider, X. He, C. Huang, C. Zhang, J. Wan, G. Ji, X. Lu, Somatic  
89 mutation of the cohesin complex subunit confers therapeutic vulnerabilities in cancer. *J.*  
90 *Clin. Invest.* **128**, 2951–2965 (2018).
- 91 10. A. Cuadrado, S. Remeseiro, O. Grana, D. G. Pisano, A. Losada, The contribution of  
92 cohesin-SA1 to gene expression and chromatin architecture in two murine tissues. *Nucleic*  
93 *Acids Res.* **43**, 3056-3067 (2015).
- 94 11. A. Cuadrado, D. Giménez-Llorente, A. Kojic, M. Rodríguez-Corsino, Y. Cuartero, G.  
95 Martín-Serrano, G. Gómez-López, M. A. Marti-Renom, A. Losada, Specific Contributions  
96 of Cohesin-SA1 and Cohesin-SA2 to TADs and Polycomb Domains in Embryonic Stem  
97 Cells. *Cell Rep.* **27**, 3500-3510.e4 (2019).
- 98 12. J. Liu, Z. Zhang, M. Bando, T. Itoh, M. A. Deardorff, D. Clark, M. Kaur, S. Tandy, T.  
99 Kondoh, E. Rappaport, N. B. Spinner, H. Vega, L. G. Jackson, K. Shirahige, I. D. Krantz,  
00 Transcriptional dysregulation in NIPBL and cohesin mutant human cells. *PLoS Biol.* **7**,  
01 e1000119 (2009).
- 02 13. D. Lehalle, A.-L. Mosca-Boidron, A. Begtrup, O. Boute-Benejean, P. Charles, M. T. Cho,  
03 A. Clarkson, O. Devinsky, Y. Duffourd, L. Duplomb-Jego, B. Gérard, A. Jacqueline, P.  
04 Kuentz, A. Masurel-Paulet, C. McDougall, S. Moutton, H. Olivié, S.-M. Park, A. Rauch,  
05 N. Revencu, J.-B. Rivière, K. Rubin, I. Simonic, D. J. Shears, T. Smol, A. L. Taylor  
06 Tavares, P. Terhal, J. Thevenon, K. Van Gassen, C. Vincent-Delorme, M. H. Willemsen,  
07 G. N. Wilson, E. Zackai, C. Zweier, P. Callier, C. Thauvin-Robinet, L. Faivre, STAG1  
08 mutations cause a novel cohesinopathy characterised by unspecific syndromic intellectual  
09 disability. *J. Med. Genet.* **54**, 479–488 (2017).
- 10 14. F. C. Soardi, A. Machado-Silva, N. D. Linhares, G. Zheng, Q. Qu, H. B. Pena, T. M. M.  
11 Martins, H. G. S. Vieira, N. B. Pereira, R. C. Melo-Minardi, C. C. Gomes, R. S. Gomez, D.  
12 A. Gomes, D. E. V Pires, D. B. Ascher, H. Yu, S. D. J. Pena, Familial STAG2 germline  
13 mutation defines a new human cohesinopathy. *NPJ genomic Med.* **2**, 7 (2017).
- 14 15. B. Yuan, J. Neira, D. Pehlivan, T. Santiago-Sim, X. Song, J. Rosenfeld, J. E. Posey, V.  
15 Patel, W. Jin, M. P. Adam, E. L. Baple, J. Dean, C.-T. Fong, S. E. Hickey, L. Hudgins, E.  
16 Leon, S. Madan-Khetarpal, L. Rawlins, C. F. Rustad, A. Stray-Pedersen, K. Tveten, O.  
17 Wenger, J. Diaz, L. Jenkins, L. Martin, M. McGuire, M. Pietryga, L. Ramsdell, L. Slattery,  
18 D. DDD Study, F. Abid, A. A. Bertuch, D. Grange, L. Immken, C. P. Schaaf, H. Van Esch,

- 19 W. Bi, S. W. Cheung, A. M. Breman, J. L. Smith, C. Shaw, A. H. Crosby, C. Eng, Y.  
20 Yang, J. R. Lupski, R. Xiao, P. Liu, Clinical exome sequencing reveals locus heterogeneity  
21 and phenotypic variability of cohesinopathies. *Genet. Med.* **21**, 663–675 (2019).
- 22 16. S. V. Mullegama, S. D. Klein, R. H. Signer, E. Vilain, J. A. Martinez-Agosto, J. A.  
23 Martinez-Agosto, Mutations in *STAG2* cause an X-linked cohesinopathy associated with  
24 undergrowth, developmental delay, and dysmorphism: Expanding the phenotype in males.  
25 *Mol. Genet. Genomic Med.* **7**, e00501 (2019).
- 26 17. H. Aoi, M. Lei, T. Mizuguchi, N. Nishioka, T. Goto, S. Miyama, T. Suzuki, K. Iwama, Y.  
27 Uchiyama, S. Mitsushashi, A. Itakura, S. Takeda, N. Matsumoto, Nonsense variants in  
28 *STAG2* result in distinct sex-dependent phenotypes. *J. Hum. Genet.* **64**, 487–492 (2019).
- 29 18. M. De Koninck, A. Losada, Cohesin mutations in cancer. *Cold Spring Harb. Perspect.*  
30 *Med.* **6**, a026476 (2016).
- 31 19. M. S. Lawrence, P. Stojanov, C. H. Mermel, J. T. Robinson, L. A. Garraway, T. R. Golub,  
32 M. Meyerson, S. B. Gabriel, E. S. Lander, G. Getz, Discovery and saturation analysis of  
33 cancer genes across 21 tumour types. *Nature.* **505**, 495–501 (2014).
- 34 20. C. Balbas-Martinez, A. Sagrera, E. Carrillo-de-Santa-Pau, J. Earl, M. Marquez, M.  
35 Vazquez, E. Lapi, F. Castro-Giner, S. Beltran, M. Bayes, A. Carrato, J. C. Cigudosa, O.  
36 Dominguez, M. Gut, J. Herranz, N. Juanpere, M. Kogevinas, X. Langa, E. Lopez-Knowles,  
37 J. A. Lorente, J. Lloreta, D. G. Pisano, L. Richart, D. Rico, R. N. Salgado, A. Tardon, S.  
38 Chanock, S. Heath, A. Valencia, A. Losada, I. Gut, N. Malats, F. X. Real, Recurrent  
39 inactivation of *STAG2* in bladder cancer is not associated with aneuploidy. *Nat Genet.* **45**,  
40 1464–1469 (2013).
- 41 21. J. Mullenders, B. Aranda-Orgilles, P. Lhoumaud, M. Keller, J. Pae, K. Wang, C. Kayembe,  
42 P. P. Rocha, R. Raviram, Y. Gong, P. K. Premssirut, A. Tsigiros, R. Bonneau, J. A. Skok,  
43 L. Cimmino, D. Hoehn, I. Aifantis, Cohesin loss alters adult hematopoietic stem cell  
44 homeostasis, leading to myeloproliferative neoplasms. *J Exp Med.* **212**, 1833–1850 (2015).
- 45 22. S. Canudas, S. Smith, Differential regulation of telomere and centromere cohesion by the  
46 *Scc3* homologues SA1 and SA2, respectively, in human cells. *J Cell Biol.* **187**, 165–173  
47 (2009).
- 48 23. F. Thol, R. Bollin, M. Gehlhaar, C. Walter, M. Dugas, K. J. Suchanek, A. Kirchner, L.  
49 Huang, A. Chaturvedi, M. Wichmann, L. Wiehlmann, R. Shahswar, F. Damm, G. Gohring,  
50 B. Schlegelberger, R. Schlenk, K. Dohner, H. Dohner, J. Krauter, A. Ganser, M. Heuser,  
51 Mutations in the cohesin complex in acute myeloid leukemia: clinical and prognostic  
52 implications. *Blood.* **123**, 914–20. (2014).
- 53 24. A. D. Viny, R. L. Bowman, Y. Liu, V.-P. Lavallée, S. E. Eisman, W. Xiao, B. H. Durham,  
54 A. Navitski, J. Park, S. Braunstein, B. Alija, A. Karzai, I. S. Csete, M. Witkin, E. Azizi, T.  
55 Baslan, C. J. Ott, D. Pe'er, J. Dekker, R. Koche, R. L. Levine, Cohesin Members Stag1 and  
56 Stag2 Display Distinct Roles in Chromatin Accessibility and Topological Control of HSC  
57 Self-Renewal and Differentiation. *Cell Stem Cell* (2019), doi:10.1016/j.stem.2019.08.003.
- 58 25. X. Ibarra-Soria, W. Jawaid, B. Pijuan-Sala, V. Ladopoulos, A. Scialdone, D. J. Jörg, R. C.  
59 V Tyser, F. J. Calero-Nieto, C. Mulas, J. Nichols, L. Vallier, S. Srinivas, B. D. Simons, B.  
60 Göttgens, J. C. Marioni, Defining murine organogenesis at single-cell resolution reveals a  
61 role for the leukotriene pathway in regulating blood progenitor formation. *Nat. Cell Biol.*  
62 **20**, 127–134 (2018).
- 63 26. C.-L. Cai, X. Liang, Y. Shi, P.-H. Chu, S. L. Pfaff, J. Chen, S. Evans, *Isl1* identifies a  
64 cardiac progenitor population that proliferates prior to differentiation and contributes a

- 65 majority of cells to the heart. *Dev. Cell.* **5**, 877–889 (2003).
- 66 27. R. G. Kelly, M. E. Buckingham, A. F. Moorman, Heart fields and cardiac morphogenesis.  
67 *Cold Spring Harb. Perspect. Med.* **4**, a015750 (2014).
- 68 28. A. Muto, A. L. Calof, A. D. Lander, T. F. Schilling, Multifactorial origins of heart and gut  
69 defects in nipbl-deficient zebrafish, a model of Cornelia de Lange Syndrome. *PLoS Biol.* **9**,  
70 e1001181 (2011).
- 71 29. R. Santos, S. Kawachi, R. E. Jacobs, M. E. Lopez-Burks, H. Choi, J. Wikenheiser, B.  
72 Hallgrímsson, H. A. Jamniczky, S. E. Fraser, A. D. Lander, A. L. Calof, Conditional  
73 Creation and Rescue of Nipbl-Deficiency in Mice Reveals Multiple Determinants of Risk  
74 for Congenital Heart Defects. *PLoS Biol.* **14**, e2000197 (2016).
- 75 30. E. J. Park, L. A. Ogden, A. Talbot, S. Evans, C.-L. Cai, B. L. Black, D. U. Frank, A. M.  
76 Moon, Required, tissue-specific roles for Fgf8 in outflow tract formation and remodeling.  
77 *Development.* **133**, 2419–33 (2006).
- 78 31. T. Sinha, D. Li, M. Théveniau-Ruissy, M. R. Hutson, R. G. Kelly, J. Wang, Loss of Wnt5a  
79 disrupts second heart field cell deployment and may contribute to OFT malformations in  
80 DiGeorge syndrome. *Hum. Mol. Genet.* **24**, 1704–16 (2015).
- 81 32. T. Tsuchihashi, J. Maeda, C. H. Shin, K. N. Ivey, B. L. Black, E. N. Olson, H. Yamagishi,  
82 D. Srivastava, Hand2 function in second heart field progenitors is essential for  
83 cardiogenesis. *Dev. Biol.* **351**, 62–9 (2011).
- 84 33. T. M. Keeley, N. Horita, L. C. Samuelson, Tamoxifen-Induced Gastric Injury: Effects of  
85 Dose and Method of Administration. *Cell. Mol. Gastroenterol. Hepatol.* **8**, 365–367  
86 (2019).
- 87 34. S. Alvarez, M. Díaz, J. Flach, S. Rodriguez-Acebes, A. J. López-Contreras, D. Martínez,  
88 M. Cañamero, O. Fernández-Capetillo, J. Isern, E. Passequé, J. Méndez, Replication stress  
89 caused by low MCM expression limits fetal erythropoiesis and hematopoietic stem cell  
90 functionality. *Nat. Commun.* **6**, 8548 (2015).
- 91 35. K. Aziz, C. J. Sieben, K. B. Jeganathan, M. Hamada, B. A. Davies, R. O. F. Velasco, N.  
92 Rahman, D. J. Katzmans, J. M. van Deursen, Mosaic-variegated aneuploidy syndrome  
93 mutation or haploinsufficiency in Cep57 impairs tumor suppression. *J. Clin. Invest.* **128**,  
94 3517–3534 (2018).
- 95 36. K. Schuster, B. Leeke, M. Meier, Y. Wang, T. Newman, S. Burgess, J. A. Horsfield, A  
96 neural crest origin for cohesinopathy heart defects. *Hum. Mol. Genet.* **24**, 7005–7016  
97 (2015).
- 98 37. K. C. Chatfield, S. A. Schrier, J. Li, D. Clark, M. Kaur, A. D. Kline, M. A. Deardorff, L. S.  
99 Jackson, E. Goldmuntz, I. D. Krantz, Congenital heart disease in Cornelia de Lange  
00 syndrome: Phenotype and genotype analysis. *Am. J. Med. Genet. Part A.* **158A**, 2499–2505  
01 (2012).
- 02 38. M. Vooijs, A. Berns, Developmental defects and tumor predisposition in Rb mutant mice.  
03 *Oncogene.* **8**, 5293–303 (1999).
- 04 39. P. Krimpenfort, K. C. Quon, W. J. Mooi, A. Loonstra, A. Berns, Loss of p16Ink4a confers  
05 susceptibility to metastatic melanoma in mice. *Nature.* **413**, 83–86 (2001).
- 06 40. H. Mi, A. Muruganujan, J. T. Casagrande, P. D. Thomas, Large-scale gene function  
07 analysis with the PANTHER classification system. *Nat. Protoc.* **8**, 1551–1566 (2013).
- 08

09 **Acknowledgments:** We acknowledge the excellent technical support of the CNIO Transgenic  
10 Mouse Models unit led by Sagrario Ortega and the CNIC Microscopy unit, in particular Verónica  
11 Labrador, as well as the help of Natalia del Pozo, Ana Cuadrado, Alba de Martino, Eduardo  
12 Caleiras, and Cristian Perna. **Funding:** This work has been supported by the Spanish Ministry of  
13 Science, Innovation and Universities and FEDER funds (grants BFU2013-48481-R and BFU2016-  
14 79841-R to A.L.; SAF2015-70553-R to F.X.R.; BFU2017-84914-P and BFU2015-72319-EXP to  
15 M.M.; BES-2014-069166 fellowship to M.D.K.), and a grant to F.X.R. and a Postdoctoral Contract  
16 to E.L. from the Fundación Científica de la Asociación Española Contra el Cáncer. Both CNIO and  
17 CNIC are supported by the Spanish Ministry of Science, Innovation and Universities and are Severo  
18 Ochoa Centers of Excellence (SEV-2015-0510; SEV-2015-0505). The CNIC is also supported by  
19 the Pro CNIC Foundation. **Author contributions:** E.L. and M.R.C. generated the *Stag2* cKO  
20 mouse; M.D.K. characterized MEFs; E.L., E.A. and I.C. carried out the studies in adult mice;  
21 M.D.K. and C.B.C. performed the embryo studies; D.G.-LL. analyzed the RNA-seq data; A.H.,  
22 M.M., F.X.R., and A.L. supervised the study and contributed to experimental design and data  
23 interpretation. **Competing interests:** There are no competing interests. **Data and materials**  
24 **availability:** Requests of *Stag2* cKO mice should be addressed to A. Losada ([alosada@cni.es](mailto:alosada@cni.es)) and  
25 F. X. Real ([preal@cni.es](mailto:preal@cni.es)).

26

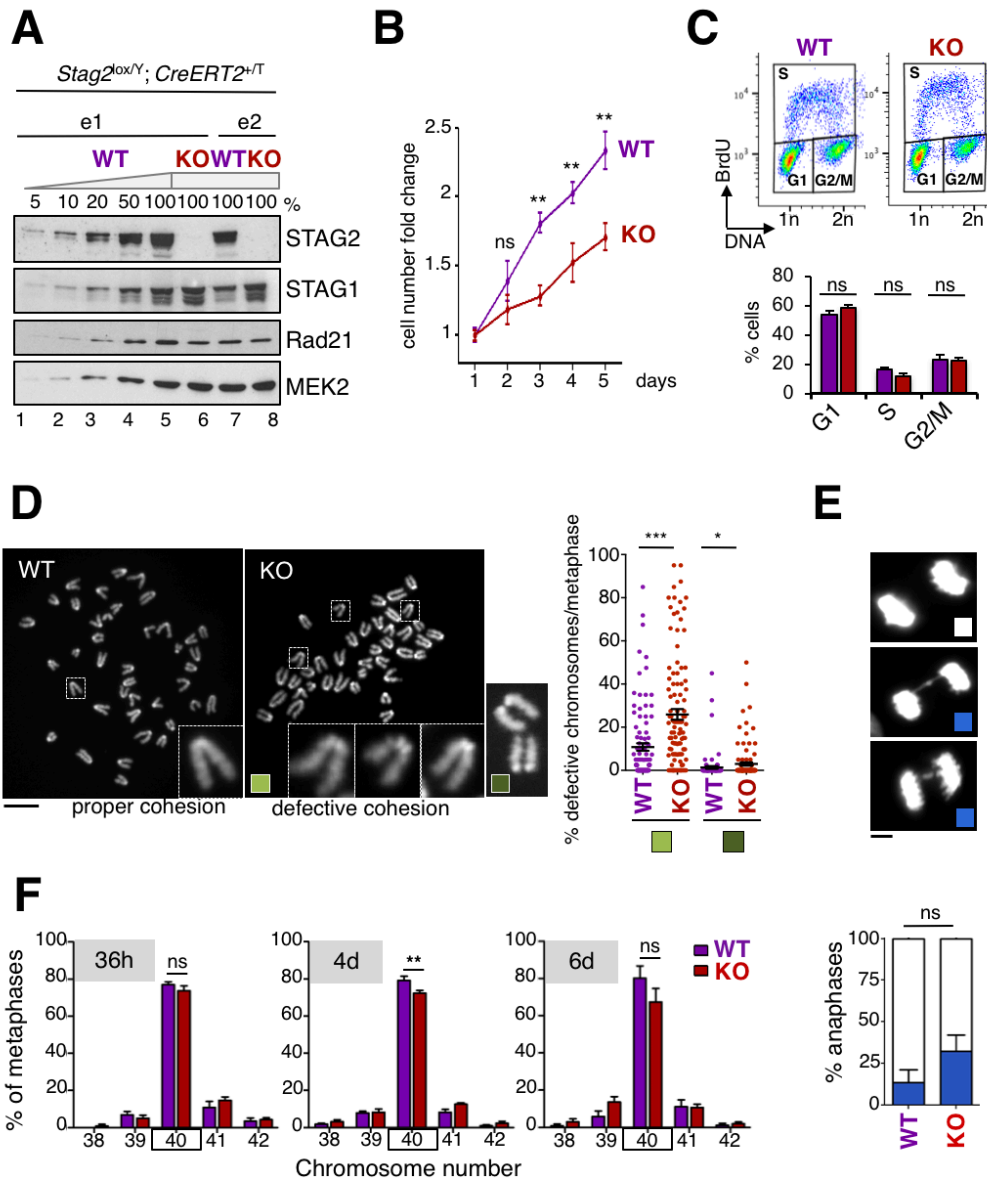

**Fig. 1. STAG2 deficient MEFs display slower proliferation and mild cohesion defects.**

**A.** Immunoblot analyses of whole cell extracts of *Stag2* cKO MEFs from two embryos (e1 and e2) untreated or treated with 4-OHT to activate CreERT2 (WT and KO hereafter). Decreasing amounts (shown as % of maximal) of WT MEF extract were loaded to estimate STAG2 depletion levels. MEK2 is used as loading control.

**B.** Growth curves of WT and KO MEFs representing the average fold increase in cell number relative to the number of cells seeded on day 1. Data from MEFs from 2 embryos, each analyzed in triplicates (mean  $\pm$  SEM).

**C.** Representative BrdU incorporation profiles by FACS in WT and KO MEFs and bar graph showing values for n=4 (mean  $\pm$  SEM).

**D.** Representative metaphase spreads from WT and KO MEFs (left) and quantification (right, mean  $\pm$  SEM) of centromeric cohesion defects. Each dot represents a single metaphase. At least 100 metaphases from MEFs from 3 different embryos were inspected. Scale bar, 10  $\mu$ m.

**E.** Images of anaphase cells, either normal or defective, found among WT and KO MEFs (top) and their quantification (bottom, mean  $\pm$  SEM). Defective anaphases include lagging chromosomes and bridges. At least 100 anaphases from MEFs from 3 different embryos were inspected. Scale bar, 5  $\mu$ m.

**F.** Quantification of chromosome number frequency in metaphase spreads of WT and KO MEFs (mean  $\pm$  SEM). The different timepoints (36h, 4d, 6d) refer to the time the cells have been cycling in the presence of 4-OHT; i.e. "36h" refers to 3 days of 4-OHT treatment upon serum starvation for proper STAG2 depletion, followed by 36h of release from the arrest. "4d" and "6d" indicate number of days in the presence of 4-OHT of asynchronously growing cells. At least 100 metaphases from MEFs from 3 different embryos were inspected.

Mann-Whitney test; \*\*\* P<0.001, \*\* P<0.01, \* P<0.05, ns P $\geq$ 0.05.

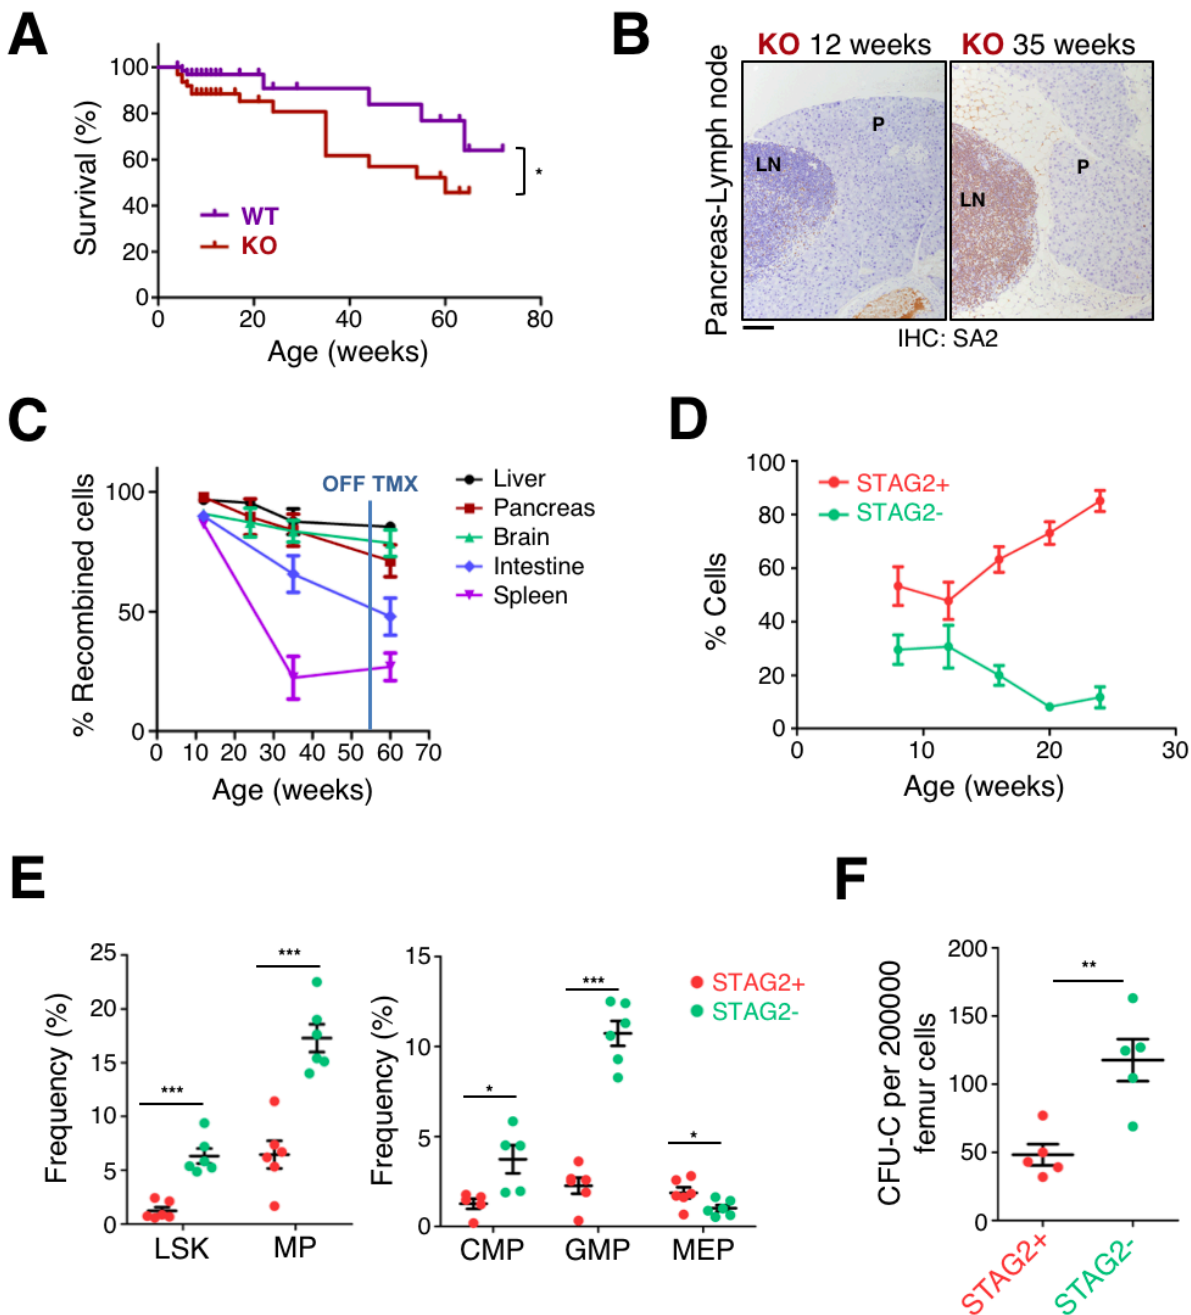

**Fig. 2. Effects of STAG2 ablation in adult mice**

**A.** Kaplan-Meier survival curves of *Stag2* KO and WT mice. Four-week old *Stag2* cKO male and female mice carrying the *Cre-ERT2* allele (KO, n=63), or not (WT, n=66), were continuously fed on a TMX-containing diet and monitored thrice weekly. No gender differences in survival were observed. Gehan-Breslow-Wilcoxon test; \*P < 0.05.

**B.** Representative images of STAG2 expression in sections of pancreas (P) and associated lymph node (LN) of KO mice at 12 (left) and 35 (right) weeks of age, assessed by IHC. Scale bar, 100  $\mu$ m.

**C.** Percentage of recombined STAG2-negative cells in various organs over time was assessed by IHC. Representative microphotographs were quantified with Image J software. Error bars indicate SEM.

**D.** Flow cytometry analysis of GFP+ (STAG2-) and Tomato+ (STAG2+) leukocytes in peripheral blood of KO mice over time (n=5). Error bars indicate SEM.

**E.** Flow cytometry analysis of bone marrow HSPCs in 12 week-old KO mice (n=6). Left, LSK (Lin- c-Kit+ Sca1+); MP (Lin- c-Kit+). Right, CMP (Lin- c-Kit+ CD34+ CD1632-); GMP (Lin- c-Kit+ CD34+ CD1632+); MEP (Lin- c-Kit+ CD34- CD1632-). Error bars indicate SEM. Unpaired t test; \*P < 0.05; \*\*\*P < 0.001

**F.** Colony-forming unit assay using FACS-sorted GFP and Tomato total bone marrow cells from 12 week-old KO mice (n=5). Error bars indicate SEM. Unpaired t test; \*\*P < 0.01.

48  
49  
50  
51  
52  
53  
54  
55  
56  
57  
58  
59  
60  
61  
62  
63  
64

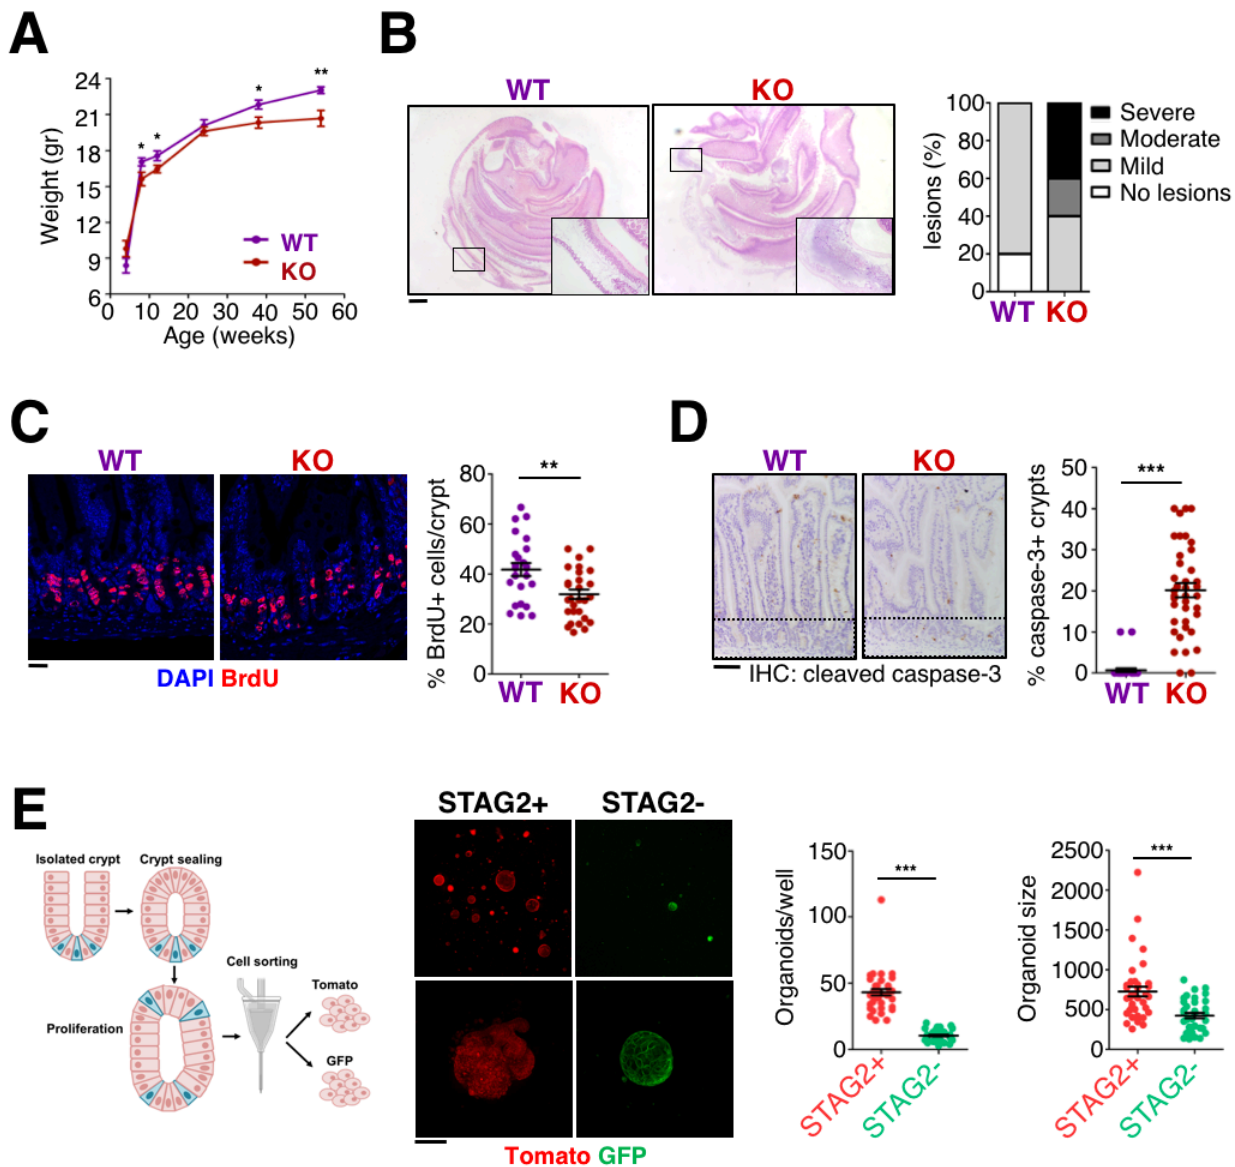

**Fig. 3. Requirement of STAG2 for intestinal cell renewal**

**A.** Weight of KO and WT mice over time (n= 18 WT, n=18 KO). Error bars indicate SEM. One-sided Mann–Whitney U test; \* P<0.05; \*\*P < 0.01.

**B.** Representative images of H-E-stained small intestine sections of 8 week-old WT and KO mice (left) and semi-quantitative assessment of severity of lesions (right). Scale bar, 1mm. (n= 5 WT and n=5 KO).

**C.** Immunofluorescence analysis of BrdU (red) in sections of 8 week-old WT and KO intestine. Nuclei are counterstained with DAPI (blue). Scale bar, 25  $\mu$ m. The percentage of BrdU+ cells per crypt is shown in the graph on the right (n= 24 WT, n=29 KO). Error bars indicate SEM. Two-tailed Mann–Whitney U test; \*\*P < 0.01.

**D.** Immunohistochemical analysis of cleaved caspase-3 in sections of 8 week-old WT and KO intestine. Nuclei are counterstained with hematoxylin. Crypt region is indicated by a dashed box. Scale bar, 50  $\mu$ m. The percentage of crypts per section showing cleaved caspase-3 staining is plotted in the graph on the right (n= 30 WT, n=39 KO). Error bars indicate SEM. Two-tailed Mann–Whitney U test; \*\*\*P < 0.001.

**E.** Scheme depicting the experimental design of intestinal organoid generation (left). Confocal microscopy images of Tomato+ (STAG2+) and GFP+ (STAG2-) organoids (middle). Scale bar, 100  $\mu$ m. Quantification of the number and size of organoids (in pixels) obtained from cells sorted from primary intestinal organoids (5000 cells/well) (right). Error bars indicate SEM. Paired T test; \*\*\*P < 0.001.

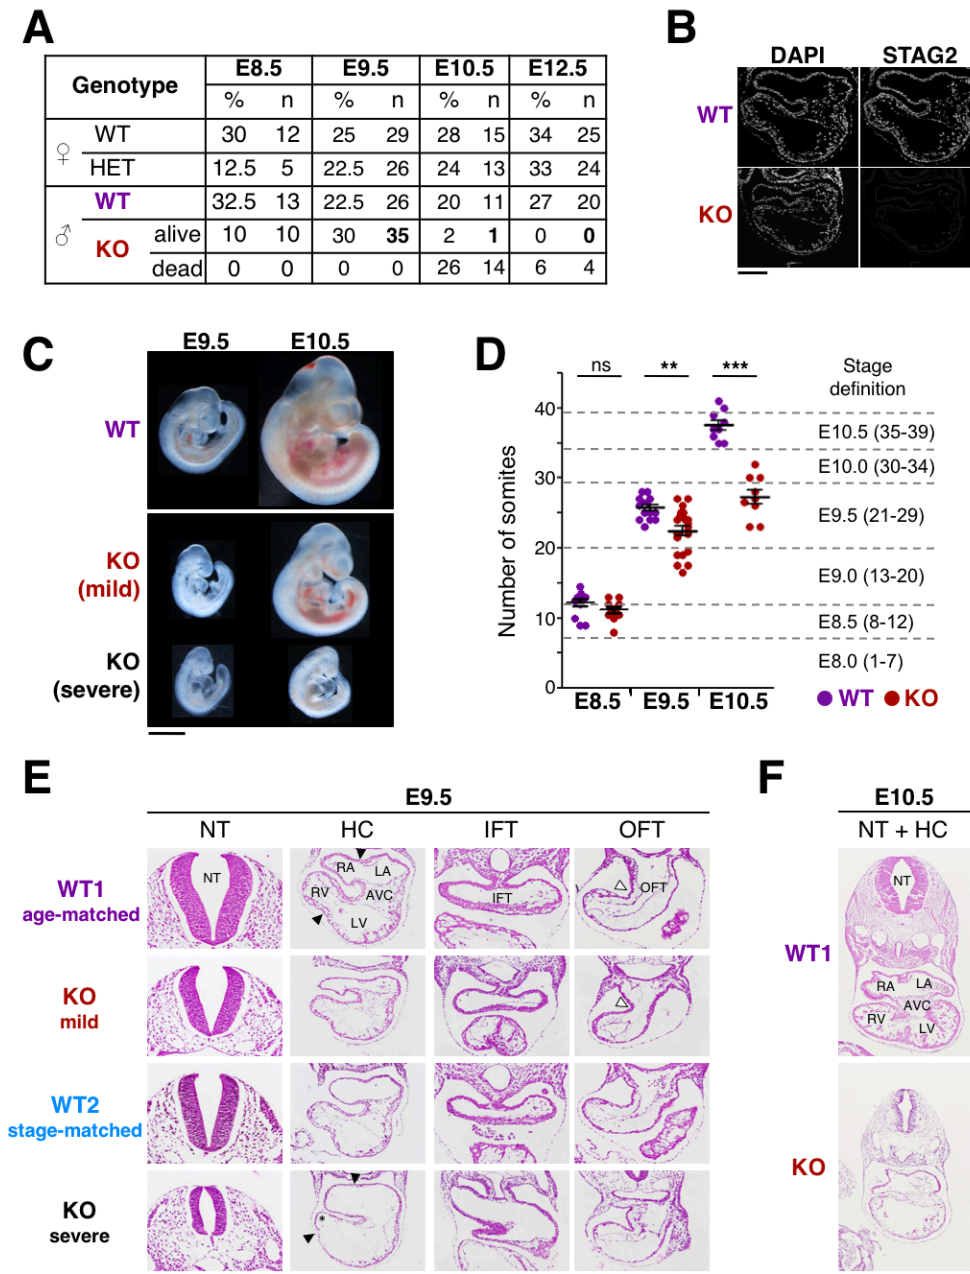

**Fig. 4. STAG2 becomes essential by mid-gestation and mutant embryos display heart defects.**

**A.** Viability of *STAG2* deficient embryos at different stages of development. We extracted 6, 14, 7 and 13 litters at E8.5, E9.5, E10.5 and E12.5, respectively. Genotypes for *Stag2* are: female WT ( $lox/+$ ), female HET ( $\Delta/+$ ), male WT ( $lox/Y$ ), male KO ( $\Delta/Y$ ).

**B.** Immunofluorescence staining of *STAG2* in transverse heart sections of WT and KO embryos at E9.5. Nuclei are counterstained with DAPI. Scale bar, 200  $\mu$ m.

**C.** Representative images of WT and KO embryos (mild and severe phenotypes) at E9.5 and E10.5. Scale bar, 1mm.

**D.** Somite number of WT and KO embryos at E8.5, E9.5 and E10.5. Somites were counted for embryos from 6 litters at E8.5 (n=13 WT and n=10 KO), 9 litters at E9.5 (n= 19 WT and n=25 KO) and 4 litters at E10.5 (n=10 WT and n=10 KO). Two-tailed Student's t-test, \*\*\*  $P < 0.001$ , \*\*  $P < 0.01$ , ns  $P \geq 0.05$ .

**E.** H-E stained transverse sections of KO (mild and severe), WT1 (age-matched control) and WT2 (stage-matched control) embryos extracted at E9.5; neural tube (NT), heart chambers (HC), inflow tract (IFT) and outflow tract (OFT); RA: right atrium; LA: left atrium; AVC: atrioventricular canal; RV: right ventricle; LV: left ventricle. Black arrowheads indicate the position of the prospective septum between right and left chambers. White arrowheads point at the OFT curve. Asterisk highlight the small size of the RV. Scale bars (valid for entire column), 100  $\mu$ m.

**F.** H-E stained transverse sections encompassing the neural tube and the heart of WT and KO embryos at E10.5. Heart regions indicated in WT, as in **E**. Scale bar, 250  $\mu$ m.



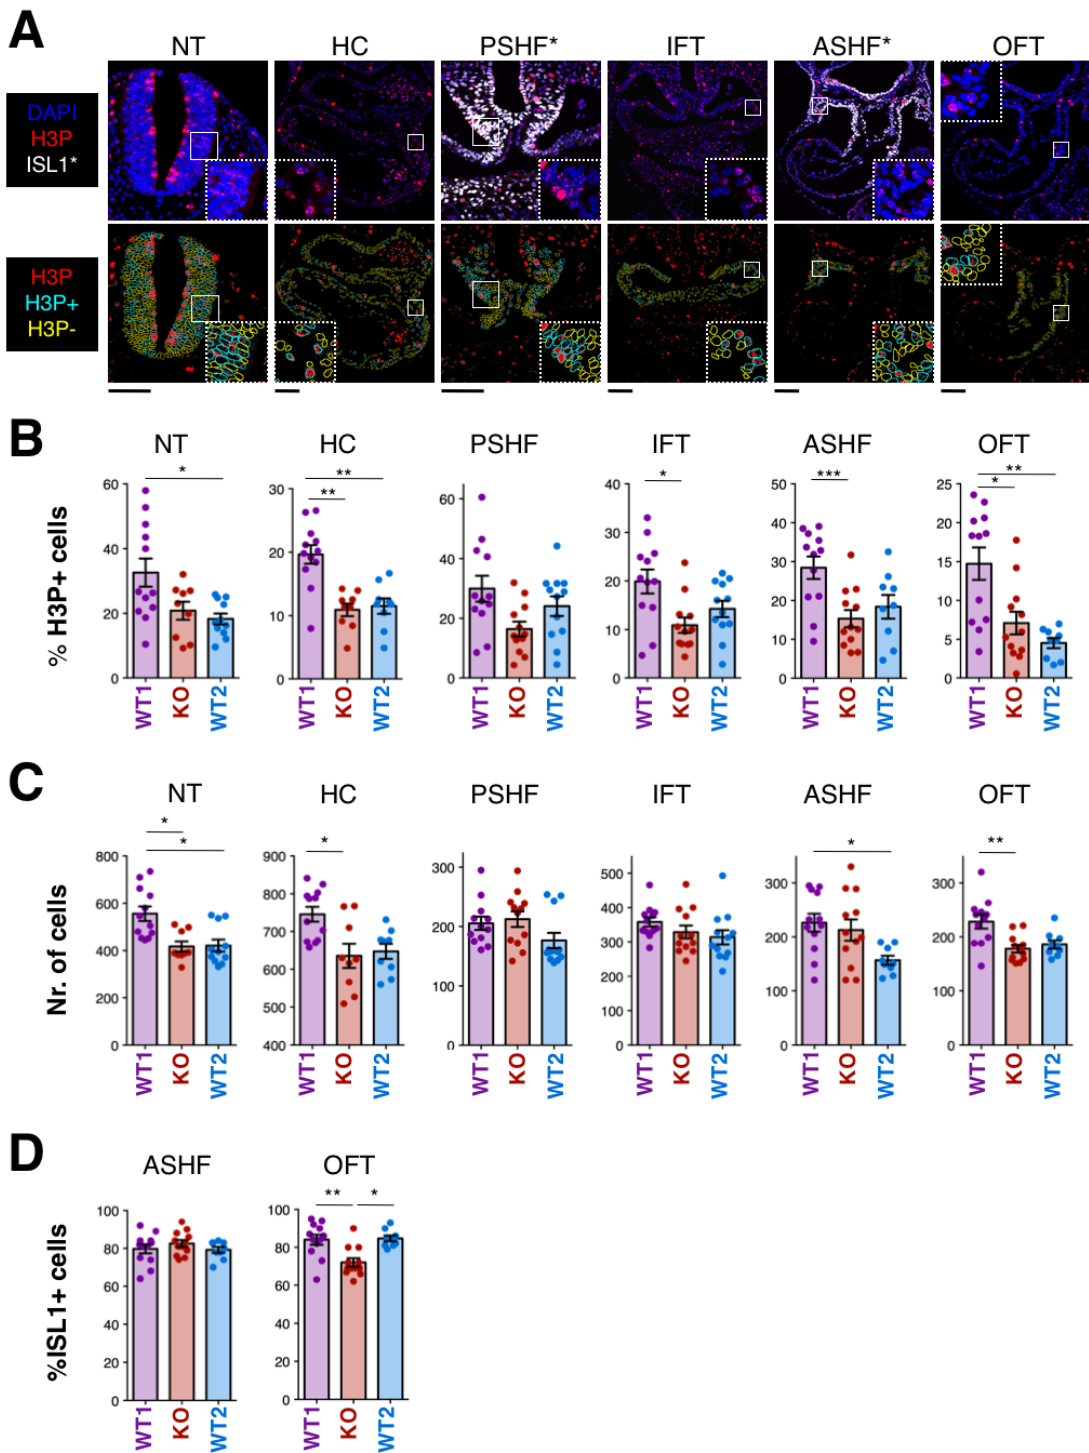

**Fig. 5. Reduced cell proliferation and impaired migration of ASHF progenitors in the developing heart of *Stag2* null embryos.**

**A.** Representative transverse sections of H3P staining of E9.5 WT1 embryos showing neural tube (NT), heart chambers (HC), posterior secondary heart field (PSHF), inflow tract (IFT), anterior secondary heart field (ASHF) and outflow tract (OFT). Upper row: original immunofluorescence signal of DAPI (blue), H3P (red) and ISL1 (white, only shown in regions marked with \*). Lower row: H3P signal converted to a binary image, with representation of nuclei selection. Similar images for KO and WT2 embryos are shown in Fig. S5. Scale bars, 100  $\mu$ m.

**B.** Quantification of H3P-positive cells as readout for proliferation in E9.5 WT1 (age-matched control), KO (mild phenotype) and WT2 (stage-matched control) embryos in the indicated regions. 9-12 non-consecutive sections from 3-4 embryos were analyzed per genotype and region.

**C.** Quantification of total number of cells per section in E9.5 WT1, KO and WT2 embryos in the indicated regions.

**D.** Quantification of ISL1-positive cells in the ASHF and OFT regions of E9.5 WT1, KO and WT2 embryos.

15

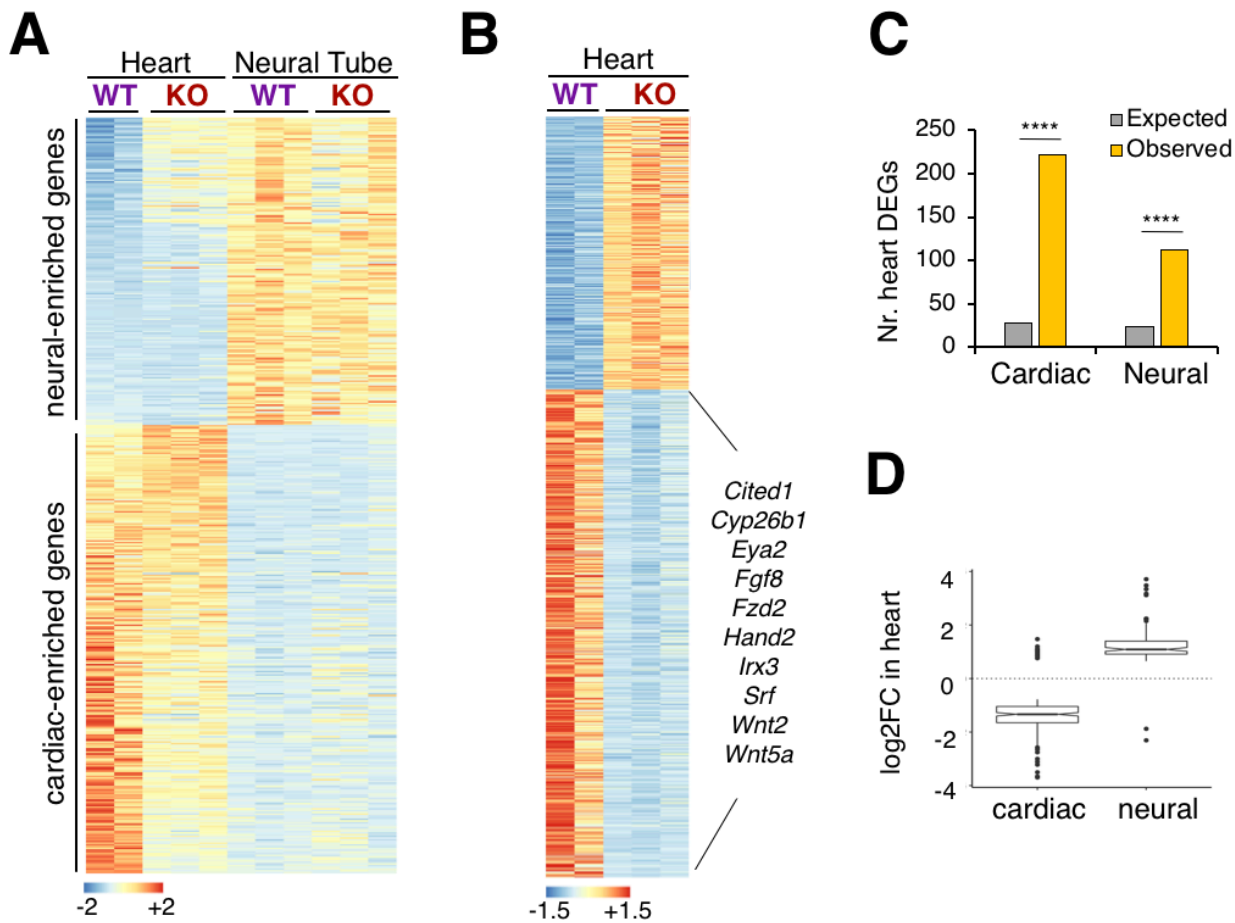

16

17

18

**Fig. 6. Transcriptional deregulation in *Stag2* null embryos.**

**A.** Heatmap showing relative expression of 1,116 cardiac- and 765 neural-enriched genes in all samples. Gene sets were defined by differential expression between WT heart and WT neural tube samples.

**B.** Heatmap of 846 DEGs in WT and KO heart samples. Among the downregulated genes, we highlight some with established roles in cardiomyocyte differentiation and SHF.

**C.** Expected versus observed number of cardiac and neural genes found among the heart DEGs. Total number of expressed genes: 21,653. Fisher's exact test; \*\*\*\* $<0.0001$  ( $p < 2E-12$ ).

**D.** Box plot of expression changes in the cardiac and neural genes identified as DEGs in heart. See also Table S1.

26

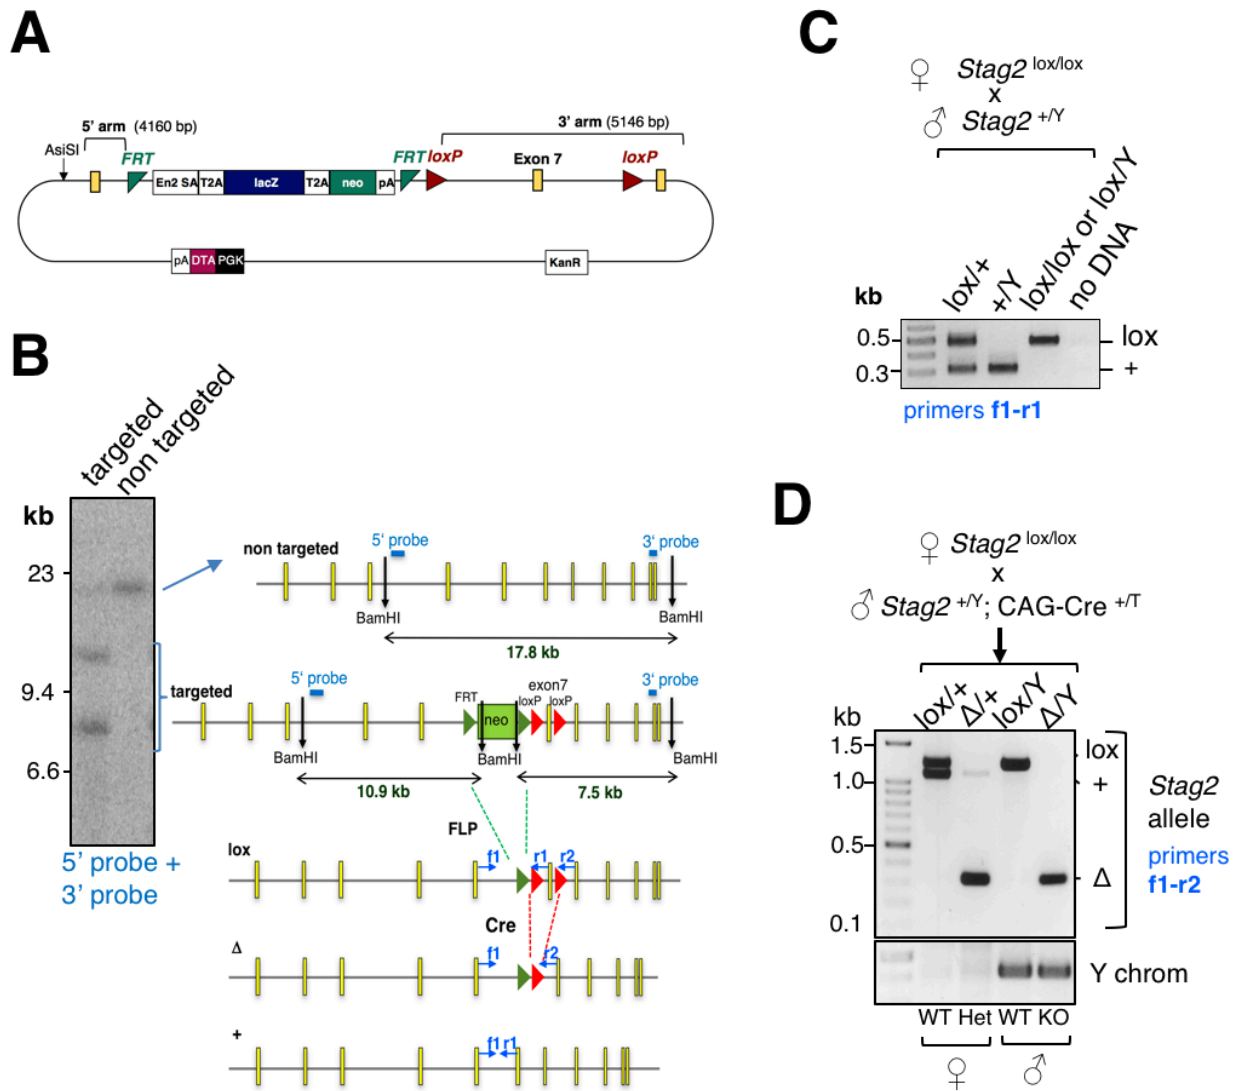

**Fig. S1. Generation of a *Stag2* cKO allele.**

**A.** Map of the vector obtained from EUCOMM to target the murine *Stag2* gene.

**B.** Southern blot analysis (left) and strategy (right) to identify targeted ES clones.

**C.** PCR analyses to genotype the *Stag2* lox and wild type (+) alleles in the offspring of the indicated mating.

**D.** PCR analyses to genotype the embryos obtained from the indicated cross, including the Y chromosome.

27  
28  
29  
30  
31  
32  
33  
34

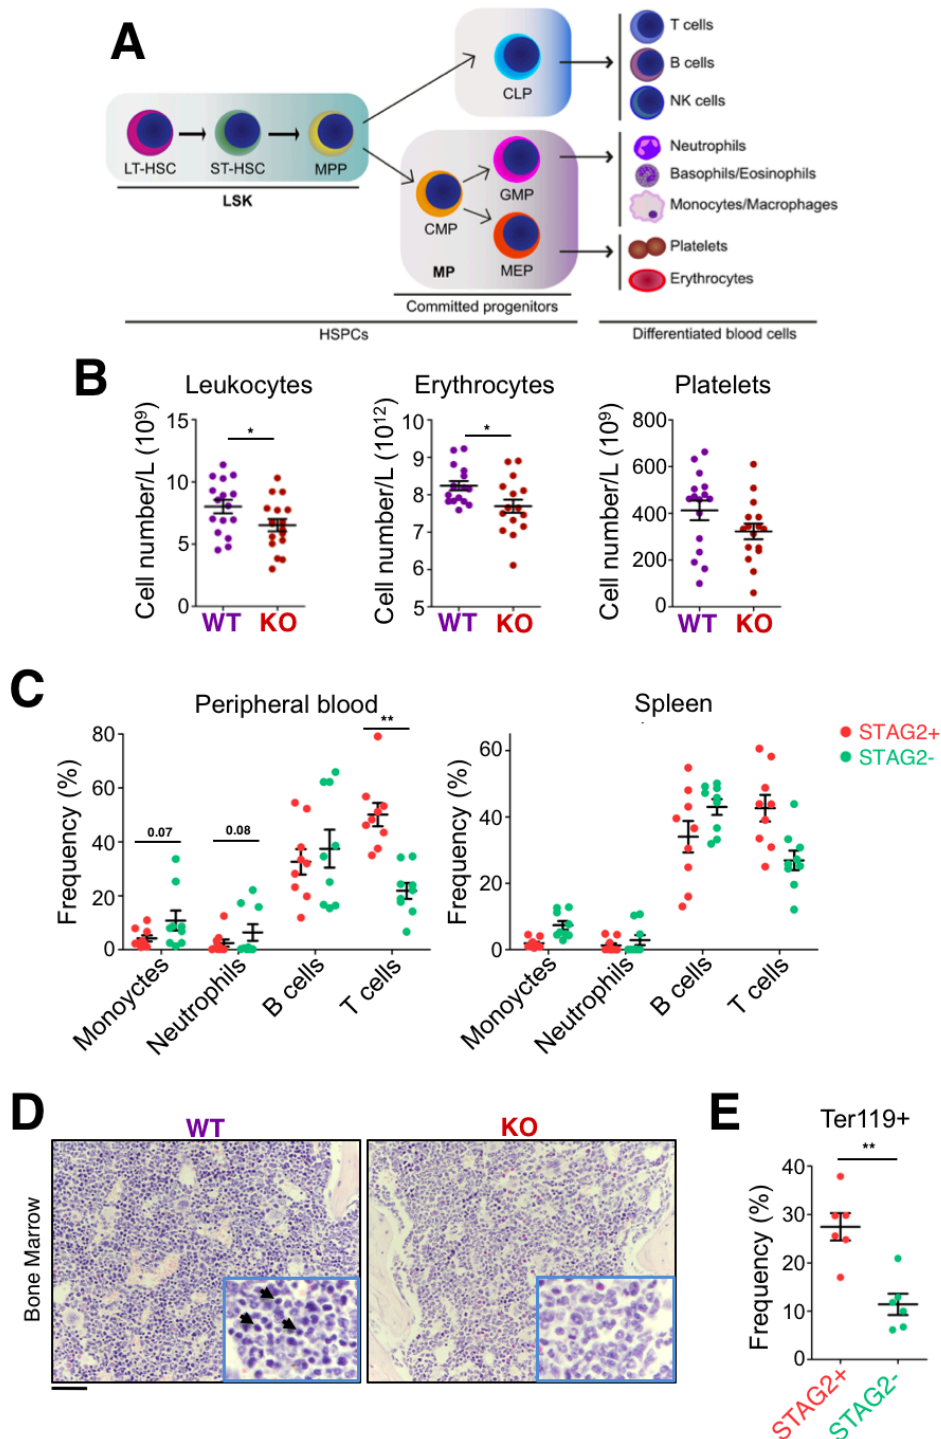

35

**Figure S2. Requirement of STAG2 for normal adult hematopoiesis.**

**A.** Scheme depicting normal hematopoiesis.

**B.** Peripheral blood counts of 12 week-old KO and WT mice (n=16 mice/genotype). Error bars indicate SEM. Two-sided Mann-Whitney U test; \*P < 0.05.

**C.** Flow cytometry analysis of GFP+ (STAG2-) or Tomato+ (STAG2+) leukocyte populations in peripheral blood and spleen of 12 week-old KO mice (n=9). Monocytes (CD3- B220- CD11b+ Ly6G-); neutrophils (CD3- B220- CD11b+ Ly6G+); B cells (CD3- B220+); T cells (CD3+ B220-). Error bars indicate SEM. Unpaired t test; \*\*P < 0.01.

**D.** H-E staining of bone marrow from 12 week-old WT and KO mice shows a decrease in the erythrocyte population (arrows) in KO mice. Scale bar, 50  $\mu$ m.

**E.** Flow cytometry analysis of bone marrow Ter119+ cells (n=6 KO). Error bars indicate SEM. Unpaired t test; \*\*P < 0.01.

48

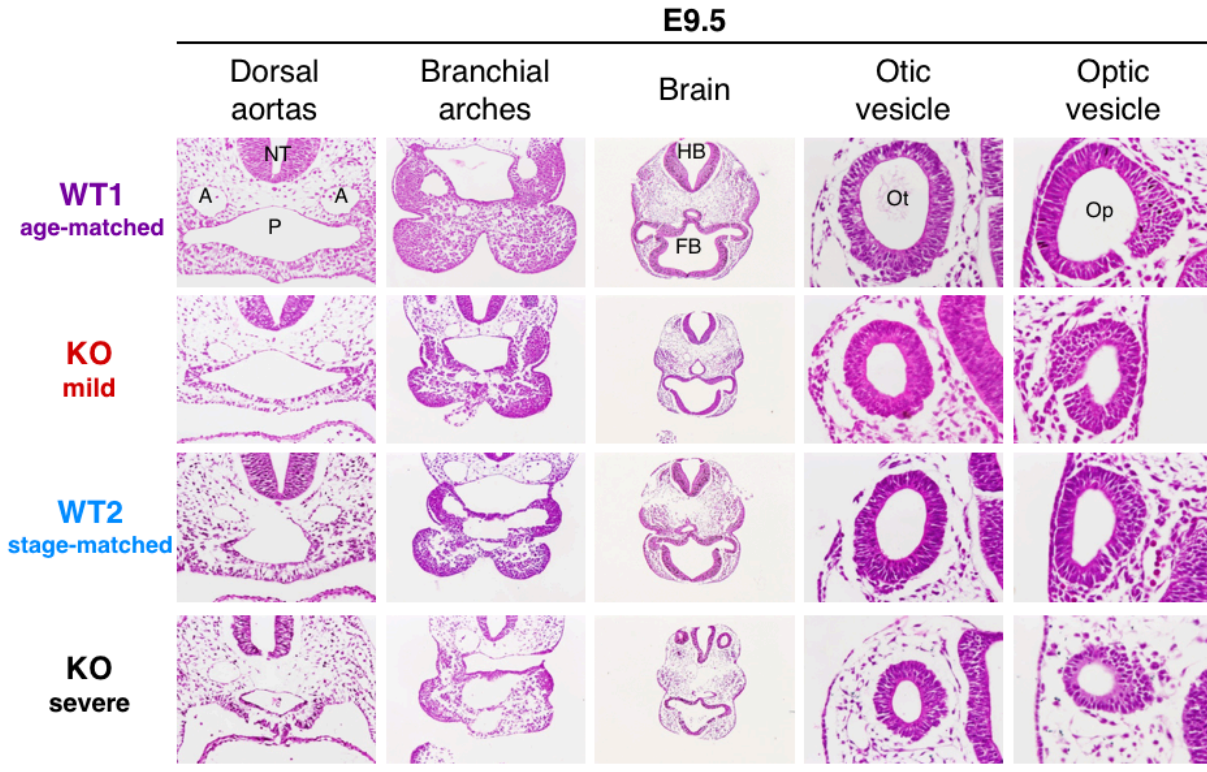

49  
50  
51  
52  
53  
54  
55  
56

**Figure S3. Global developmental defects in *Stag2* null E9.5 embryos.**

H-E stained transverse sections of *Stag2* null (KO, mild and severe), WT1 (age-matched control) and WT2 (stage-matched control) embryos extracted at E9.5. NT: neural tube. A: aorta. P: pharynx. HB: hindbrain. FB: forebrain. Ot: otic vesicle. Op: optic vesicle. Scale bars (for entire column): 100  $\mu$ m for dorsal aortas, branchial arches and brain; 25  $\mu$ m for otic and optic vesicles.

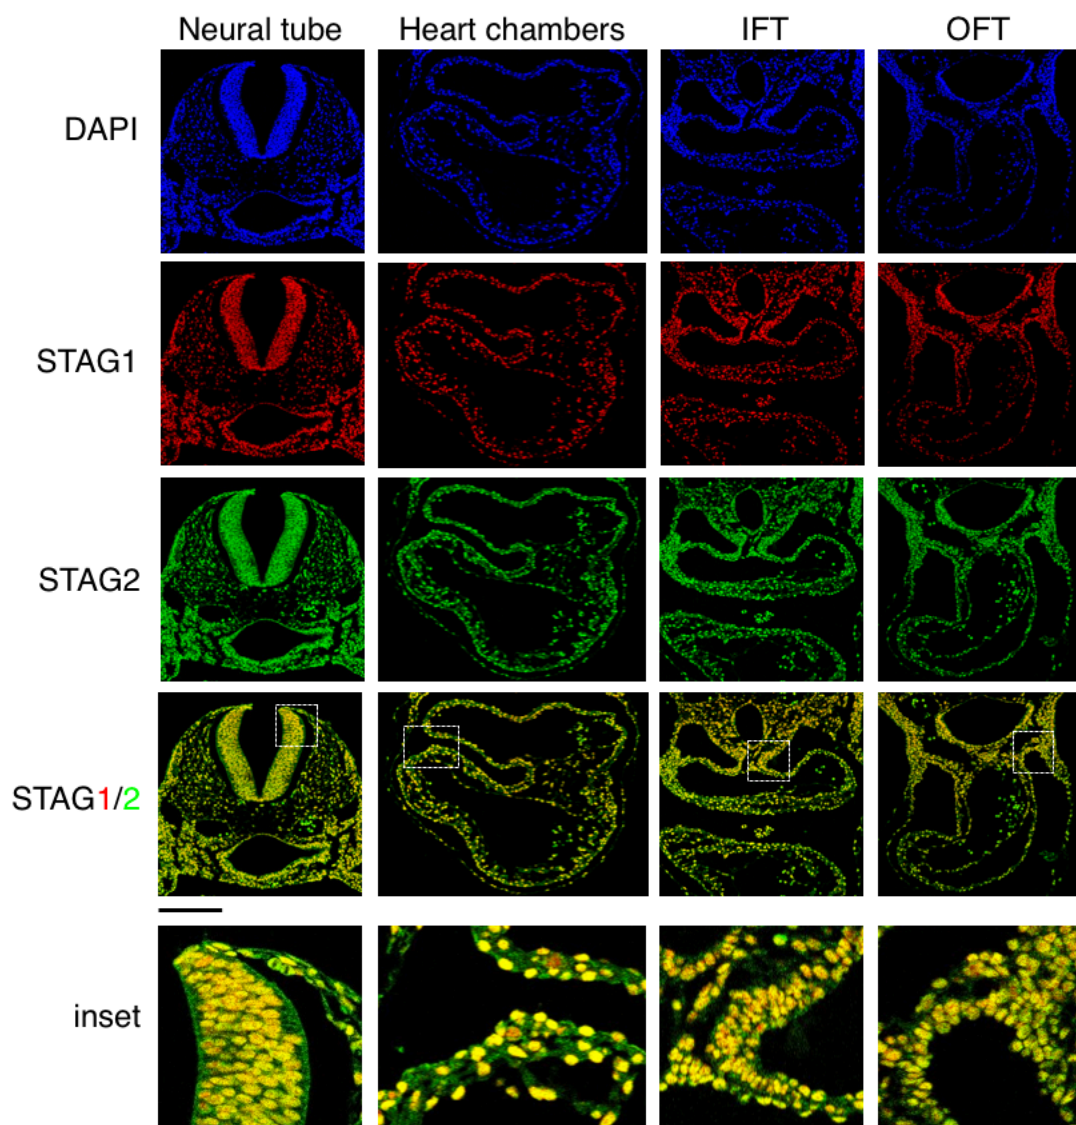

57

58 **Figure S4. Distribution of cohesin variants in the E9.5 embryo.**

59 Immunofluorescence co-staining of STAG1 (red), STAG2 (green) and DAPI (blue) in transverse sections containing  
60 the heart of wild type E9.5 embryos. Scale bar, 200  $\mu$ m.

61

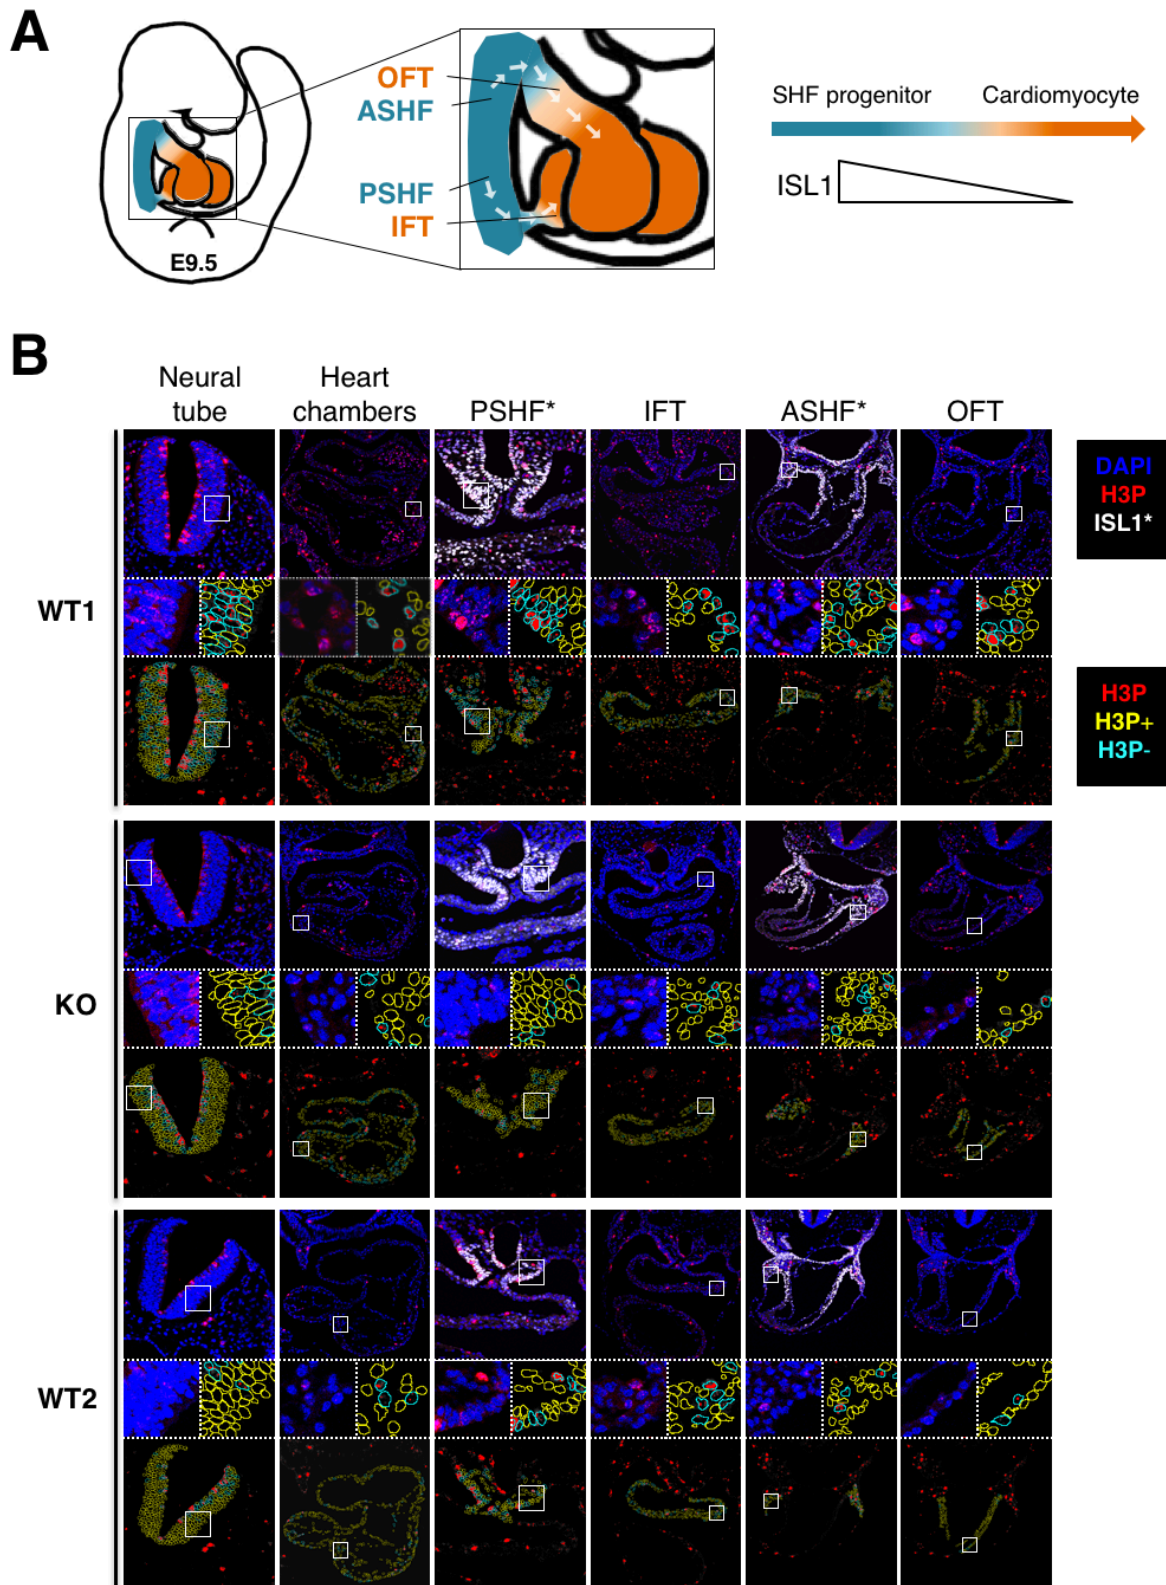

62  
63 **Figure S5. Decreased proliferation in *Stag2* null embryos.**

64 **A.** Scheme depicting the migration of second heart field (SHF) progenitors into the heart tube of an E9.5 embryo;  
65 outflow tract (OFT), anterior SHF (ASHF), posterior SHF (PSHF), inflow tract (IFT), Islet1 transcription factor  
66 (ISL1).

67 **B.** Representative images of H3P staining and image processing in E9.5 WT1 (age-matched control), KO (mild  
68 phenotype) and WT2 (stage-matched control) embryos. For each region and genotype are shown the original  
69 immunofluorescence signals (top) of DAPI (blue), H3P (red) and ISL1 (white, only shown in regions marked \*),  
70 and the binary H3P signal (bottom), with corresponding insets. Scale bars, 100  $\mu$ m.

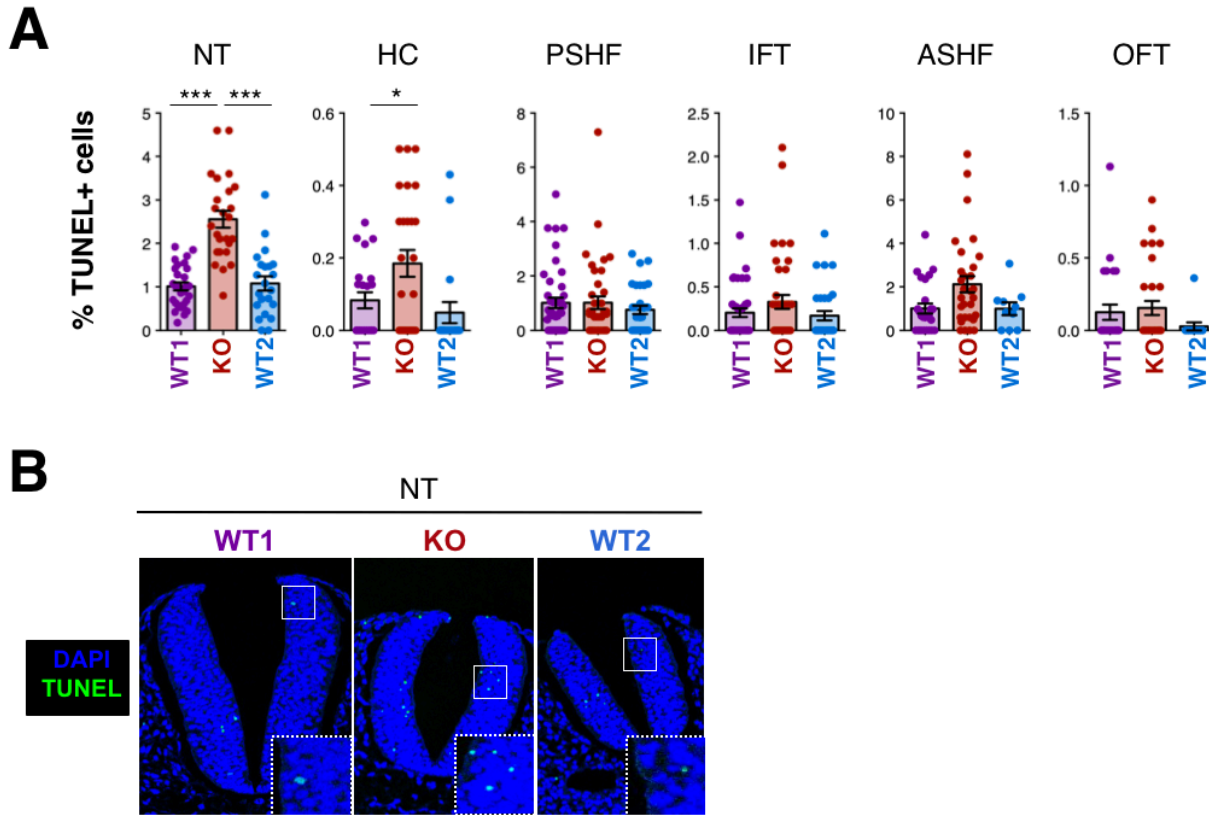

**Figure S6. Increased apoptosis in *Stag2* null embryos.**

A. Quantification of TUNEL-positive cells as readout for apoptosis in E9.5 WT1, KO and WT2 embryos in neural tube (NT), heart chambers (HC), posterior secondary heart field (PSHF), inflow tract (IFT), anterior secondary heart field (ASHF) and outflow tract (OFT). At least 10 sections from 3-4 embryos were analyzed per genotype and region. Mean  $\pm$  SEM are shown. Kruskal-Wallis test and Dunn's multiple comparison post-test; \*\*\*  $P < 0.001$ , \*  $P < 0.05$ , ns  $P \geq 0.05$ .

B. Representative images of TUNEL staining in neural tube. Scale bar, 100  $\mu$ m.

Individual dots represent values for one section.

71  
72  
73  
74  
75  
76  
77  
78  
79  
80  
81  
82



83

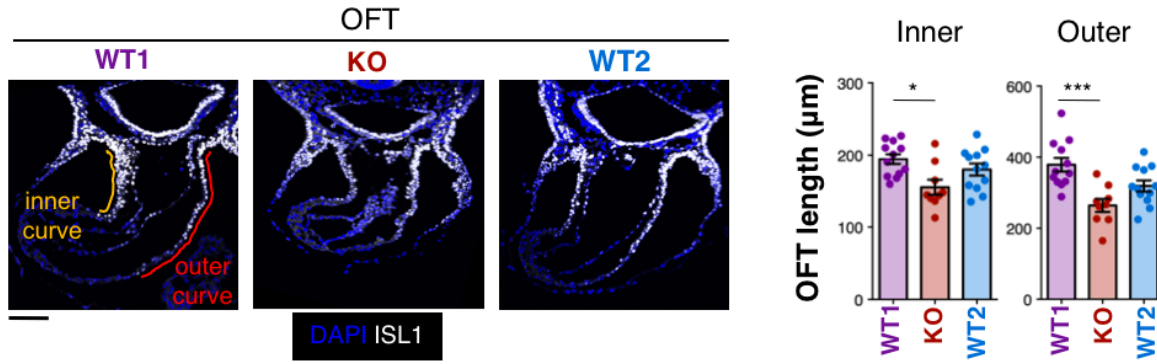

84  
85  
86  
87  
88  
89  
90  
91  
92

**Fig. S7. Decreased outflow tract length in *Stag2* null embryos.**

Representative outflow tract (OFT) images for WT1 (age-matched control), KO (mild phenotype) and WT2 (stage-matched control) E9.5 embryos (left) and measurement of inner and outer OFT length (right). 9-12 sections from 3-4 embryos were analyzed per genotype. Mean  $\pm$  SEM are shown. Kruskal-Wallis test and Dunn's multiple comparison post-test; \*\*\*  $P < 0.001$ , \*  $P < 0.05$ , ns  $P \geq 0.05$ .
